1 **Title: The race goes on: A fall armyworm-resistant maize inbred line influences**  
2 **insect oral secretion elicitation activity and nullifies herbivore suppression of plant**  
3 **defense**

4  
5 Saif ul Malook<sup>1,2\*</sup>, Xiao-Feng Liu (刘小凤)<sup>1\*</sup>, Wende Liu (刘文德)<sup>2</sup>, Jinfeng Qi (齐金峰)<sup>3</sup>,  
6 Shaoqun Zhou (周绍群)<sup>1†</sup>

7  
8 <sup>1</sup> Shenzhen Branch, Guangdong Laboratory for Lingnan Modern Agriculture, Genome Analysis  
9 Laboratory of the Ministry of Agriculture, Agricultural Genomics Institute at Shenzhen, Chinese  
10 Academy of Agricultural Sciences, 440307, Shenzhen, China

11 <sup>2</sup> State Key Laboratory for Biology of Plant Diseases and Insect Pests, Institute of Plant  
12 Protection, Chinese Academy of Agricultural Science, Beijing 100193, China

13 <sup>3</sup> Department of Economic Plants and Biotechnology, Yunnan Key Laboratory for Wild Plant  
14 Resources, Kunming Institute of Botany, Chinese Academy of Sciences, Kunming 650201,  
15 China

16  
17 \* These authors contributed equally to this publication.

18 † Correspondence author: Shaoqun Zhou, +86-138-2310-1530, [zhoushaoqun@caas.cn](mailto:zhoushaoqun@caas.cn)

19  
20 **ORCID**s: 0000-0002-0647-4456 (SuM); 0000-0003-4576-9094 (XFL); 0000-0002-5570-1395  
21 (WL); 0000-0001-6689-915X (JQ); 0000-0002-3643-7875 (SZ)

22  
23 **Word Counts**

24 Introduction: 1,021

25 Materials and Methods: 901

26 Results: 3,235

27 Discussion: 1,164

28 Other sections: 164

29 Total: 6,480

30 **Number of figures:** 9

31 **Number of supporting information:** 4 (figures) + 9 (tables)

## 32 Summary

- 33 • Fall armyworm (*Spodoptera frugiperda*) is an invasive lepidopteran pest with strong  
34 feeding preference towards maize (*Zea mays*). Its success on maize is facilitated by a  
35 suite of specialized detoxification and manipulation mechanisms that curtail host plant  
36 defense responses.
- 37 • In this study, we identified a Chinese maize inbred line Xi502 that was able to mount  
38 effective defense in response to fall armyworm attack. Comparative transcriptomics  
39 analyses, phytohormonal measurements, and targeted benzoxazinoid quantification  
40 consistently demonstrate significant inducible defense responses in Xi502, but not in the  
41 susceptible reference inbred line B73.
- 42 • In 24 hours, fall armyworm larvae feeding on B73 showed accelerated maturation-  
43 oriented transcriptomic responses and more changes in detoxification gene expression  
44 compared to their Xi502-fed sibling. Interestingly, oral secretions collected from larvae  
45 fed on B73 and Xi502 leaves demonstrated distinct elicitation activity when applied on  
46 either host genotypes, suggesting that variation in both insect oral secretion composition  
47 and host plant alleles could influence plant defense response.
- 48 • These results revealed host plant adaptation towards counter-defense mechanisms in a  
49 specialist insect herbivore, adding yet another layer to the evolutionary arms race  
50 between maize and fall armyworm. This could facilitate future investigation into the  
51 molecular mechanisms in this globally important crop-pest interaction system.

52

53 **Key words:** Fall armyworm, *Zea mays*, insect oral secretion, plant-insect interactions,  
54 evolutionary arms race

## 55 **Introduction**

56 Fall armyworm (*Spodoptera frugiperda*, FAW) is a lepidopteran herbivore with strong feeding  
57 preference towards maize (*Zea mays*). Since its spread from the tropical/sub-tropical region of  
58 the New World into Africa and Asia, it has become a serious threat to local maize production and  
59 food security (Goergen *et al.*, 2016; Sun *et al.*, 2021). Management of FAW in its native range of  
60 North America is mostly achieved by widespread adoption of transgenic maize cultivars  
61 expressing a pyramid of *Bacillus thuringiensis* (*Bt*) toxic proteins, whereas chemical pesticides  
62 and well-designed agronomic practices such as the push-pull system has been deployed in areas  
63 with restricted access to transgenic crops (Buntin *et al.*, 2004; Midega *et al.*, 2018; Yang *et al.*,  
64 2021). With accumulation of field-evolved resistance against *Bt* toxins among FAW populations,  
65 and the expanding range of this invasive pest, additional control measures are required to devise  
66 an effective and sustainable pest management strategy for FAW (Zhu *et al.*, 2019). Development  
67 and adoption of genetically pest-resistance crop cultivars is an important component of a  
68 successful integrative pest management system. In maize, a crop well-known for its vast within-  
69 species natural variation, FAW-resistant inbred line Mp708 has been developed in 1990, and  
70 subsequent mechanistic studies have led to the characterization of an insecticidal cysteine  
71 proteinase, Mir1-CP (Williams *et al.*, 1990; Jiang *et al.*, 1995; Pechan *et al.*, 1999; Pechan *et al.*,  
72 2000; Pechan *et al.*, 2002). Since then, a handful of potential FAW-resistant maize cultivars have  
73 been identified through field tests over the years, but few has been further examined for its  
74 resistance mechanism (Abel *et al.*, 2000; Ni *et al.*, 2011; Ni *et al.*, 2012; Ni *et al.*, 2013; Farias *et*  
75 *al.*, 2014)

76         Meanwhile under laboratory and greenhouse conditions, FAW has emerged as an  
77 interesting model species for its specialized dietary preference towards maize compared to its  
78 sister *Spodoptera* species. Maize and a few other poaceous crops produce benzoxazinoid  
79 compounds as their main specialized metabolites (Zhou *et al.*, 2018). These compounds are  
80 important for maize defense against diverse phytopathogens and herbivorous insect of different  
81 feeding guilds (Ahmad *et al.*, 2011; Meihls *et al.*, 2013). Glauser *et al.* (2011) found that FAW  
82 larvae were not deterred by a common maize benzoxazinoid compound 2,4-dihydroxy-7-  
83 methoxy-1,4-benzoxazin-3-one (DIMBOA), and their growth were not inhibited by this  
84 compound toxic to other generalist *Spodoptera* larvae. Subsequent studies have demonstrated  
85 that FAW was capable of re-glycosylating DIMBOA as well as its toxic degradation product

86 through specialized UDP-glycosyltransferases (UGTs), deactivating this plant defensive  
87 compound (Maag *et al.*, 2014; Wouters *et al.*, 2014; Israni *et al.*, 2020). This benzoxazinoid  
88 detoxification pathway is likely a part of a broader plant defense tolerance mechanism of FAW,  
89 as other insect gene families including cytochrome P450-dependent monooxygenases (CYP450),  
90 ATP-binding cassette-containing (ABC) transporters, and glutathione-S-transferases (GSTs) are  
91 also commonly associated with plant defense tolerance across diverse herbivorous insect species  
92 (Kennedy & Tierney, 2013). Most recently, two FAW ABC transporters are reported to be  
93 involved in detoxification of *Bt* toxins (Jin *et al.*, 2021). Yet, besides these isolated examples,  
94 little is known about how FAW respond to feeding on maize genotypes of contrasting resistance  
95 phenotypes on a systematic level.

96 In addition to detoxifying the hallmark defensive metabolite of maize, FAW is also  
97 known to manipulate maize inducible defense responses. Feeding by FAW larvae could induce  
98 accumulation of toxic benzoxazinoid compounds, ribosome-inactivating proteins, and herbivore-  
99 induced plant volatiles (Glauser *et al.*, 2011; Chuang *et al.*, 2014; De Lange *et al.*, 2020). Yet,  
100 such induction tends to be weaker than those elicited by sister generalist *Spodoptera* species (De  
101 Lange *et al.*, 2020). While the exact molecular signaling network that mediate this induction  
102 event is yet to be elucidated, it is assumed that this network would be consistent with the  
103 theoretical paradigm established in other model plant species. To re-capitulate briefly, herbivore-  
104 associated molecular patterns and damage-associated molecular patterns such as volicitins and  
105 inceptins would be perceived by plant cell surface receptors. This binding will lead to cross-  
106 membrane potential change, calcium ion influx, and activation of mitogen-activated protein  
107 kinase (MAPK) signaling cascade. These early signaling events will converge on the induction  
108 of jasmonic acid and its bioactive isoleucine conjugate, which will in turn induce the  
109 transcriptomic activation of downstream transcription factors and executor genes (Erb &  
110 Reymond, 2019). In support of the conservation of this model in maize, *ZmMPK6*-silenced  
111 plants demonstrated elevated benzoxazinoids content and enhanced insect resistance (Zhang *et al.*  
112 *et al.*, 2021). Therefore, the reduced induction of maize defense responses upon FAW feeding  
113 could be a result of an insect-produced signaling interference molecule (*i.e.* an effector), similar  
114 to the HARP1 protein first identified in cotton bollworm (Chen *et al.*, 2019). Proteomics and  
115 targeted metabolomics analyses of FAW saliva have revealed a list of potential plant defense-  
116 manipulating effectors including glucose oxidases and diverse phytohormones (Acevedo *et al.*,

117 2017; Acevedo *et al.*, 2019). Similarly, a maize-produced chitinase has been identified in the  
118 frass of FAW larvae, which could also suppress maize defense responses (Ray *et al.*, 2016).  
119 Interestingly, the defense-suppressing activity of FAW appeared to be maize-specific as it failed  
120 to suppress the defense response of cotton plants (De Lange *et al.*, 2020). These observations  
121 have led us to hypothesize that maize could evolve counteracting mechanism to nullify the host-  
122 adapted defense-suppressing activity of FAW.

123 In this study, we identified a novel FAW-resistant Chinese maize inbred line, Xi502,  
124 through no-choice feeding assay under controlled environmental conditions. Comparative  
125 transcriptomic analyses, phytohormone measurements, and benzoxazinoids quantification  
126 demonstrated that FAW larvae feeding was not able to suppress the inducible defense response  
127 in Xi502 as oppose to the successful defense manipulation in the susceptible maize inbred B73.  
128 Parallel transcriptomic analyses of the FAW larvae feeding on these two maize inbreds revealed  
129 accelerated transcriptomic re-programing towards maturation when feeding on the susceptible  
130 B73 and preferential expression of aromatic compound breakdown-related genes in Xi502-fed  
131 larvae. Finally, we demonstrated significant deviation in temporal dynamics of B73 leaf  
132 transcriptomic and phytohormonal responses towards FAW oral secretions (OS) collected from  
133 feeding on either B73 or Xi502, indicating that the host plant genotype can influence the  
134 outcome of maize-FAW interactions both by changing the eliciting activity of FAW OS and by  
135 allelic variation in the perceptive components of FAW OS.

136

## 137 **Materials and Methods**

### 138 **Plant and insect materials**

139 Seeds of diverse maize germplasm were originally obtained from Dr. Jianbin Yan at the  
140 Huazhong Agricultural University. Fall armyworms were collected in Yunnan, China and  
141 maintained on artificial diet under laboratory conditions over generations by Dr. Yutao Xiao at  
142 the Agricultural Genomics Institute at Shenzhen. For all experiments, maize seeds were  
143 germinated in 1 L pots filled with commercial potting soil (Pindstrup) with approximately 5 to 1  
144 ratio of vermiculite. Long day light conditions (16 hours) and temperature variation of  $24 \pm 4^\circ\text{C}$   
145 day,  $20 \pm 4^\circ\text{C}$  night was provided in the growth chamber. Ten days old maize plants, when the  
146 second leaf were fully developed and expanded from the whorl, were used for all experiments.

### 147 **Herbivore performance bioassay and elicitation experiments**

148 For inbred line screening, 20 seedlings of each genotype were placed together in a metal-wired  
149 cage, and two FAW neonates were placed onto each seedling. After seven days of free-range  
150 feeding within the cage, larvae were recovered and weighed. Eight maize genotypes were tested  
151 in either round of screening, including B73 as a control for batch effect. Within either batch,  
152 larvae weight on the other seven genotypes were compared to that on B73 with Dunnett's tests.  
153 For RNAseq, phytohormone measurement, and benzoxazinoid quantification experiments, one  
154 second instar larva was caged onto the second leaf of each seedling with a perforated 45 x 30 x  
155 30 cm<sup>3</sup> transparent PVC box for designated length of time. All larvae were starved for 2 hours  
156 prior to the start of the experiments to ensure prompt start of feeding. Seven to ten independent  
157 biological replicates of each genotype and each treatment time points were prepared to account  
158 for potential larvae escape or total tissue consumption. Upon harvest, 5 of the biological  
159 replicates were weighed, collected into 2 mL centrifuge tubes, and snap frozen in liquid nitrogen  
160 for subsequent analyses. For the OS-treated leaf transcriptomics experiment, 3 biological  
161 replicates were collected for each treatment and each time point following the same procedure.

#### 162 **Phytohormone profiling**

163 About 150-200 mg of frozen leaf samples were ground in liquid nitrogen and the powder was  
164 extracted with ice-cold ethyl acetate spiked with D6-JA, 13C6-JA-Ile, D5-IAA, 2H6ABA, and  
165 4HSA analytical standards. After centrifugation at 13,000 g for 10 min at room temperature  
166 (25 °C), supernatants were removed and transferred to fresh centrifuge tubes. The pellets were  
167 re-extracted with 0.5 mL of ethyl acetate and centrifuged. Supernatants were combined and then  
168 evaporated to dryness on a vacuum concentrator. The residues were resuspended in 0.5 mL of  
169 70% methanol (v/v) and analyzed by HPLC MS/MS (LCMS-8040 system, Shimadzu) according  
170 to Wu *et al.* (2007). Target phytohormone concentrations were estimated by ratio of target peaks  
171 to their respective analytical standards and normalized by tissue fresh weight.

#### 172 **Benzoxazinoid extraction**

173 Approximately 150 ± 2.5 mg of frozen grounded leaf samples were used to extract  
174 benzoxazinoids. Leaf samples were suspended with MeOH/H<sub>2</sub>O (50:50, v/v; 0.5% formic acid)  
175 in 2 mL centrifuge tubes and vortexed vigorously for 15-20 min. Samples were then centrifuged  
176 at 13,000 g for 15 min, and 400 µL of the supernatants of benzoxazinoids were transferred to  
177 glass vials for analysis on an HPLC MS/MS system (LCMS-8040, Shimadzu) according to Qi *et al.*  
178 *al.* (2016). Characteristic benzoxazinoid compounds were confirmed with purified standards.

## 179 **RNAseq library preparation and data analyses**

180 All RNA samples were extracted following the routine TRIzol protocol. RNA quality was  
181 assessed on 1% agarose gels and with the RNA Nano 6000 Assay Kit of the Bioanalyzer 2100  
182 system (Agilent Technologies, CA, USA). For each sample, 1 µg RNA was used to generate a  
183 pair-end sequencing library using NEBNext® Ultra™ RNA Library Prep Kit for Illumina®  
184 (NEB, USA) following manufacturer's recommendations and index codes were added to track  
185 sequences to each sample, and library quality was re-assessed on the Bioanalyzer 2100 system.

186 After removing adaptor and low-quality reads, the remaining clean pair-end reads were  
187 mapped onto *Zea mays* B73 Refgen v4 or *Spodoptera frugiperda* reference genome with STAR  
188 aligner (Dobin *et al.*, 2013; Jiao *et al.*, 2017; Zhang *et al.*, 2020). Raw read counts were  
189 calculated with HTseq-count, and differentially expressed genes (DEGs) were calculated with  
190 the DESeq2 package with a cutoff of FDR < 0.05 and FC > 2 (Anders *et al.*, 2015). Gene  
191 ontology enrichment analyses with each set of DEGs were carried out on the agriGO v2.0 online  
192 platform, and significantly enriched classes were determined by adjusted p < 0.05 (Tian *et al.*,  
193 2017). Raw read counts were converted to fragments per kilobase per million mapped (fpkm)  
194 values for principal component analyses (PCA) and pairwise correlation tests between samples in  
195 each experiment (Fig S2). In the FAW-attacked maize leaf transcriptomics experiment, one  
196 FAW-infested B73 sample showed significant deviation from the remaining 4 biological  
197 replicates and was removed from later DEG analyses (Fig. S3).

## 198 **FAW OS collection and treatment**

199 FAW larvae were reared on artificial diet until 4-5<sup>th</sup> instar. Before OS collection, caterpillars  
200 were grown on Xi502 or B73 plants for 24 hours. Stork bill forceps were used to gently squeeze  
201 the caterpillars to provoke regurgitation, and OS were collected on ice with a pipette and  
202 immediately centrifuged to obtain supernatant, which was divided into small aliquots before  
203 being stored at -80 °C. Ten days old maize seedlings were wounded by a tracing wheel, and OS  
204 or water was applied on the wounding marks and gently rubbed. Treated leaf tissues were  
205 harvested as described above at designated time points.

206

## 207 **Results**

208 **Xi502 plants demonstrates stronger resistance against fall armyworms and shorter growth**  
209 **stature.**



210 Through caged larvae feeding assay under controlled environmental conditions, we have  
211 identified a number of maize genotypes that demonstrated stronger resistance against FAW than  
212 the reference maize inbred B73 (Fig. S1). Among these candidates, we further confirmed the  
213 resistant phenotype of Xi502 in two separate rounds of experiments, as measured by larvae fresh  
214 weight after 7 days feeding (Fig. 1a-c). During these bioassays and later seed propagation work  
215 in the field, we noticed that Xi502 plants grew significantly shorter than B73 at both seedling  
216 and mature stages (Fig. 1d-f).

217 **Fall armyworm feeding induces more pronounced defensive transcriptomic signatures in**  
218 **Xi502 than in B73.**

219 Since the FAW resistance mechanism has rarely been studied in Chinese maize genotypes, we  
220 further compared the responses of Xi502 and B73 to FAW infestation through whole  
221 transcriptome profiling. To that end, B73 and Xi502 leaf tissues subjected to first instar larvae  
222 feeding for 24 hours, alongside with empty cage control samples, were collected for RNAseq.  
223 Principal component analysis (PCA) of the resulting expression matrix revealed greater  
224 separation between FAW-attacked Xi502 and control Xi502 samples compared to their  
225 corresponding B73 groups (Fig. 2a; Table S1). Consistently, more than 2,000 DEGs (up-  
226 regulated: 1,555; down-regulated: 525) were identified between FAW-attacked and control  
227 Xi502, whereas only 175 DEGs (up-regulated: 124; down-regulated: 51) were found in B73  
228 tissues after 24 hours of FAW feeding (Fig. 2b). Among these DEGs, 80 genes were  
229 differentially expressed in the same direction in both B73 and Xi502, 95 genes were uniquely  
230 induced or suppressed in B73, and 2,000 genes were only affected by FAW feeding in Xi502  
231 (Fig. 2c).

232 Given the small number of DEGs in B73, subsequent gene ontology (GO) term  
233 enrichment analyses were done by genotype and by direction of change in expression without  
234 looking for overlap between genotypes. Analyses with FAW-induced DEGs in Xi502 showed  
235 significant over-representation of genes involved in wounding response (GO: 0009611),  
236 response to jasmonic acid (GO: 0009753), and many other categories typically associated with  
237 defense against chewing insect herbivores (Table S2). By contrast, the small number of up-  
238 regulated genes in B73 were only slightly enriched towards the phenylpropanoid metabolic  
239 process (GO:0009698) and endopeptidase inhibitor activity (GO: 0010951; Table S2). FAW-  
240 suppressed genes in Xi502 were primarily enriched in photosynthesis-related GO categories,



241 while none of the same category was over-represented by the 51 FAW-suppressed B73 genes  
242 (Table S2). Results from these untargeted analyses suggest that Xi502 can mount a more  
243 pronounced plant defense response upon FAW attack than B73, including activation of classical  
244 stress-related phytohormone signaling pathways and suppression of photosynthetic activities.

245 Plant-derived toxic proteins and specialized metabolites are known to involve in maize  
246 defense against FAW. Yet, two maize defense proteins previously associated with FAW  
247 resistance, Mir1-CP (Zm00001d036542) and RIP2 (Zm00001d010371), showed very low level  
248 of expression in both genotypes with or without FAW feeding, suggesting that they may not  
249 explain the differential resistance phenotypes observed between B73 and Xi502 (Table S1).  
250 Another recently identified maize protein potentially enhancing FAW resistance  
251 (Zm00001d048950; (Dowd *et al.*, 2020) showed stronger induction (as well as higher  
252 expression) in B73 compared to Xi502, which was inconsistent with our phenotypic observations  
253 (Table S1). Yet, a couple of generic defense-related proteins that have not been specifically  
254 associated with defense against FAW, demonstrated higher expression and/or inducibility in  
255 Xi502 than B73 (Fig. 3a; Table S1).

256 In addition to toxic proteins, maize also produces a suite of anti-herbivore compounds,  
257 including benzoxazinoids and terpenoids. Constitutively, core benzoxazinoid biosynthetic genes  
258 (*i.e.* *Bx1-9*) express up to more than 10-fold higher in B73 than in Xi502 (as in the case for *Bx2*).  
259 Yet, after 24 hours of FAW feeding, the expression of Bx genes reach similar, if not higher, level  
260 in Xi502 than in B73, suggesting much stronger inducibility in Xi502. Two indole-3-glycerol  
261 phosphate synthases paralogs, IGPS1 and IGPS3, that were recently added to the beginning of  
262 the benzoxazinoid biosynthetic pathway also showed comparable constitutive expression level in  
263 the two maize genotypes, and significantly higher expression in Xi502 than B73 after FAW  
264 feeding (Richter *et al.*, 2021). For the more derived steps of the benzoxazinoid biosynthetic  
265 pathway, more dramatic difference in inducibility was observed such that *Bx10-14* expression  
266 were induced up to 16.8 folds in B73 but induced over 2,000 folds in Xi502 (Fig. 3b). These later  
267 steps are known to convert 2,4-dihydroxy-7-methoxy-1,4-benzoxazin-3-one glucoside  
268 (DIMBOA-Glc), the primary benzoxazinoid compound in temperate maize inbred lines that has  
269 little inhibitory effect on FAW to its more toxic methylated derivative, 2-hydroxy-4,7-  
270 dimethoxy-1,4-benzoxazin-3-one glucoside (HDMBOA-Glc). The stronger FAW-inducibility in

271 Xi502 was also observed for terpene synthases responsible for the production of insect  
272 parasitoid-attracting linalool (TPS1/2/6/11) and *E*- $\beta$ -caryophyllene (TPS8/10/23; Fig. 3c).

273 Induction of toxic protein and specialized metabolite production are primarily regulated  
274 by the jasmonic acid (JA) and ethylene (ET) signaling networks in plants (Erb & Reymond,  
275 2019). Similar to the expression pattern of benzoxazinoid and terpenoid biosynthetic genes,  
276 constitutive expression levels of JA metabolic genes were generally higher in B73 than Xi502,  
277 but the FAW inducibility tended to be higher in Xi502 (Fig. 3d). None of the ET metabolic gene  
278 examined showed significant inducible changes in expression after 24 hours of continuous FAW  
279 feeding, though two different paralogs of 1-aminocyclopropane-1-carboxylate oxidases were  
280 most highly expressed in B73 and Xi502 (Table S1). Besides small molecule phytohormones,  
281 elicitor peptides have emerged more recently as yet another class of important regulators of  
282 defense responses in maize. Among the five ZmPROPEP-encoding genes, ZmPROPEP2  
283 (Zm00001d026405) showed highest expression in all of our samples, but no significant  
284 difference was found between genotypes or in response to FAW attack (Table S1). On the other  
285 hand, ZmPROPEP3 (Zm00001d002138) expression was almost 100-fold higher in Xi502 than  
286 B73 under both constitutive and induced conditions (Table S1). Since this peptide has been  
287 recently demonstrated to have the strongest elicitation effect, the relatively low absolute  
288 expression level (compared to ZmPROPEP2) may be sufficient to induce significant defense  
289 responses nevertheless (Poretsky *et al.*, 2020).

290 **Fall armyworm feeding induces stronger and more sustained jasmonates accumulation in**  
291 **Xi502 than B73.**

292 Targeted and untargeted transcriptomic analyses consistently suggested that FAW feeding  
293 induced stronger defense responses in Xi502 than in B73. Since JA accumulation could occur  
294 within a few hours of external stimuli, we conducted a separate FAW feeding time course  
295 experiment to measure JA and bioactive JA-isoleucine (JA-Ile) levels in FAW-attacked B73 and  
296 Xi502 leaf tissues after 0, 2, 6, or 24 hours of feeding. Using two-way ANOVA with plant  
297 genotype and feeding duration as two independent variables, we found only significant elevation  
298 of JA and JA-Ile levels in Xi502 tissues after 24 hours of FAW feeding, consistent with the  
299 stronger FAW inducibility of JA-biosynthetic genes in this inbred (Table S3). We then compared  
300 JA and JA-Ile levels between B73 and Xi502 at each time point with independent Student's *t*-  
301 tests. By this less stringent comparison scheme, we were able to find that Xi502 contained higher

302 level of JA than B73 constitutively as well as after 24 hours of FAW feeding. JA-Ile content was  
303 also higher in Xi502 after 24 hours of FAW infestation. After 2 hours of feeding though, Xi502  
304 tissue accumulated significantly higher level of JA, whereas B73 tissue contained higher level of  
305 JA-Ile. When comparing measurement at each time point to the mock treatment control within  
306 either genotype, JA level was not significantly elevated in B73 until after 6 hours of feeding,  
307 while Xi502 had a clear early induction peak after just 2 hours of FAW feeding. JA-Ile level was  
308 weakly (but significantly) induced in B73 after 2 hours of feeding, and remained stable at later  
309 examined time points. On the other hand, induction of JA-Ile in Xi502 followed a linear increase  
310 pattern within the 24 hours testing period, and eventually reached more than 7-fold higher than  
311 B73 (Fig. 4a,b).

312 The different post-feeding dynamics of JA and JA-Ile between B73 and Xi502 prompted  
313 us to further examine the ratio of these two compounds at each time points. Remarkably, the JA-  
314 Ile/JA ratio increased over 270 folds after 2-hours of FAW feeding in B73, but gradually  
315 decayed back to about 20% of peak level by 24 hours. By contrast, the JA-Ile/JA ratio  
316 demonstrated a slow but constant elevation pattern in Xi502 during FAW feeding, and after 24  
317 hours, reached a comparable level observed in B73 after 2 hours of FAW feeding (Fig. 4c).

### 318 **Xi502 accumulates higher levels of benzoxazinoids effective against fall armyworm than** 319 **B73.**

320 Benzoxazinoids are the most abundant defensive metabolites in maize. Various species of  
321 benzoxazinoid compounds, however, demonstrate contrasting efficiency in inhibiting the growth  
322 of the maize-specialized FAW larvae. The differential expression of benzoxazinoid biosynthetic  
323 genes in B73 and Xi502 with or without FAW infestation suggested that the content of  
324 benzoxazinoids compounds may vary significantly between these two genotypes (Fig 3b).

325 Measurement of seven different stable benzoxazinoid glucosides produced at different steps of  
326 its well-studied biosynthetic pathway after 48 hours of FAW feeding revealed a strong genotypic  
327 influence on these compounds both under constitutive and FAW-induced conditions.

328 Surprisingly, despite of the overall lower constitutive expression of benzoxazinoid biosynthetic  
329 genes in Xi502, it contained significantly higher levels of four of the seven benzoxazinoid  
330 glucosides, under both constitutive and induced conditions ( $p < 0.05$ , two-way ANOVA; Figure  
331 5; Table S4). This included the FAW-toxic HDMBOA-Glc, which was almost 7-fold higher in  
332 Xi502 than in B73 constitutively. While the lack of variation in DIBOA-Glc and HDM<sub>2</sub>BOA-

333 Glc levels in our experiment were perhaps best explained by their low concentrations, DIMBOA-  
334 Glc remained a clear exception to the general trend such that its level was significantly higher in  
335 B73 than Xi502 ( $p < 0.05$ , two-way ANOVA; Figure 5; Table S4). Significant differences by  
336 FAW treatment were only found for DIMBOA-Glc and HMBOA-Glc, but these differences did  
337 not exist between control and FAW-attacked groups of the same maize genotype. Interestingly,  
338 HM<sub>2</sub>BOA-Glc level was only induced in Xi502, demonstrating a strong genotype-by-treatment  
339 effect ( $p < 0.05$ , two-way ANOVA; Figure 5; Table S4). Adding together, Xi502 constitutively  
340 produced significantly higher level of total benzoxazinoid glucosides, but FAW infestation did  
341 not appear to have any impact on their total concentration in either maize genotype.

342 In the same LC-MS assay, we were also able to detect and quantify three benzoxazinoid  
343 degradation products, which were believed to actually carry out the anti-feeding bioactivity  
344 against lepidopteran herbivores (Zhou *et al.*, 2018). Similar to the benzoxazinoid glucosides, all  
345 three degradation products were found in significantly higher levels in Xi502. Intriguingly, the  
346 final degradation product, BOA, was induced by almost 40 folds only in Xi502 ( $p < 0.05$ , two-  
347 way ANOVA; Figure 5; Table S4). As a result, the total benzoxazinoid degradation product was  
348 constitutively higher in Xi502, and could be further induced in this genotype only.

### 349 **Feeding on resistant and susceptible maize tissue leads to distinct transcriptomic response** 350 **in fall armyworm larvae.**

351 As an herbivore with strong preference towards feeding on maize, FAW is known to equip with  
352 various counter-defense mechanisms to promote its survival and growth. To examine the  
353 potential influence of feeding on the resistant Xi502 and the susceptible B73 on the physiology  
354 of FAW, we collected the second instar larvae from the same 24-hours feeding experiment for  
355 RNAseq analyses, using artificial diet-fed larvae from the same hatching batch as the control. In  
356 sharp contrast to the results from the plant transcriptomic data, PCA of the FAW RNAseq data  
357 showed that larvae fed on B73 seedlings had more significant transcriptomic change from the  
358 control compared to those feeding on Xi502 (Fig. 6a; Table S5). This result was echoed by the  
359 larger number of DEGs in B73-fed FAW larvae (up-regulated: 593; down-regulated: 1,069) than  
360 their Xi502-fed siblings (up-regulated: 367; down-regulated: 118; Figure 6b). We found  
361 significant overlap between DEGs identified from the two maize diet groups each compared to  
362 the artificial diet control, and almost all changes in expression are in the same direction (Fig. 6c).  
363 In addition to the shared DEGs, FAW larvae fed on B73 also showed a large number of group-

364 specific DEGs (up-regulated: 751; down-regulated: 498), while DEGs specific to Xi502-fed  
365 larvae were considerably fewer (up-regulated: 47; down-regulated: 25).

366 Gene Ontology term enrichment analyses with shared DEGs revealed a number of lipid  
367 metabolism-related GO categories were significantly over-represented among up-regulated  
368 genes, while cellular transport-related genes were disproportionately down-regulated in the larvae  
369 disregard of the maize genotype they fed on (Table S6). Genes up-regulated specifically in B73-  
370 fed larvae were functionally-enriched in cytoskeleton organization (GO:0030036), cell adhesion  
371 (GO:0007155), and development of reproductive systems (GO:0061458) and sensory perception  
372 systems (GO:0007605; Table S6). On the other hand, down-regulated genes specific in B73-fed  
373 larvae were over-represented in various metabolic processes including purine nucleotide  
374 (GO:0006163), fatty acid biosynthesis (GO:0006633), and alpha-amino acid (GO:1901605;  
375 Table S6). Since there were only a few DEGs specific to Xi502-fed FAW larvae, we combined  
376 the up- and down-regulated genes for GO term enrichment analysis. Interestingly, genes  
377 involved in aromatic compound catabolic process (GO:0019439) was most significantly enriched  
378 among these DEGs (Table S6). This GO category was not identified in any of the other four  
379 enrichment analyses performed with shared or B73-specific DEGs, suggesting that aromatic  
380 compound breakdown may indeed be a specifically-induced physiological process for FAW  
381 larvae feeding on Xi502.

382 To specifically examine the expression dynamics of potential detoxification-related  
383 genes, we collected all expressed ABC transporters, CYP450s, GSTs, and UGTs-encoding genes  
384 in the FAW transcriptome through Hidden Markov Model search, and compared their expression  
385 under the three feeding regimes. Consistent with the PCA results using all expressed genes, PCA  
386 of potential detoxification-related genes also demonstrated more significant deviation in B73-fed  
387 larvae than in Xi502-fed ones when compared to the artificial diet-fed control group, such that  
388 the expression of these genes showed greater change in B73-fed larvae (Fig. 6d,e).

### 389 **Oral secretions from fall armyworm feeding on B73 and Xi502 elicit distinct temporal** 390 **dynamics in B73**

391 Components of FAW OS and frass have been reported to suppress maize defense responses  
392 (Acevedo *et al.*, 2017; Acevedo *et al.*, 2019). Meanwhile, the compositions of FAW OS and  
393 frass are known to be significantly influenced by the larvae's diet, and the very plant defense-  
394 suppressing molecules can originate from the consumed plant tissues (Ray *et al.*, 2016). The

395 overwhelming difference in B73 and Xi502 leaf tissue response to FAW feeding at transcriptome  
396 level led us to hypothesize that the OS resulted from FAW feeding on these two maize genotypes  
397 could have distinct biochemical composition and hence differential bioactivity in maize-FAW  
398 interaction. To test this hypothesis, OS were collected from FAW larvae reared on B73 or Xi502  
399 leaves (referred to as OS<sub>B73</sub> and OS<sub>Xi502</sub> hereafter, respectively), and used to treat B73 leaves  
400 after mechanic wounding. Leaf tissues were collected at 15 minutes, 2 hours, and 6 hours post-  
401 treatment, with wounding plus water treatment (W+W) as the control for each time point. In  
402 support of our hypothesis, principal component analyses of the RNAseq data revealed clear  
403 distinction between W+OS<sub>B73</sub> and W+OS<sub>Xi502</sub> treated groups at 15 minutes and 2 hours post-  
404 treatment, while the differentiation between the OS and water treatment groups was apparent  
405 across all three tested time points (Fig. 7a-c; Figure S4; Table S7).

406 In congruence to the PCA results, more DEGs were identified between the W+OS<sub>Xi502</sub>  
407 group and the W+W group than between the W+OS<sub>B73</sub> group and the W+W group at all three  
408 time points (Fig. 7d). When comparing the two OS treatment groups directly, 230 DEGs were  
409 found at 15 minutes post-treatment, whereas only 5 genes were differentially expressed between  
410 the two groups at either of the two later time points (Fig. 7d). Gene ontology enrichment  
411 analyses of the 498 DEGs between the W+OS<sub>Xi502</sub> group and the W+W group showed that a  
412 number stimuli-responsive GO categories, including response to chitin (GO:0010200) and  
413 response to jasmonic acid (GO:0009753), were over-represented among these DEGs (Fig. 7d;  
414 Table S8). In contrast, no GO term was enriched among the 30 DEGs between the W+OS<sub>B73</sub>  
415 group and the W+W group at the same time point. The 230 DEGs found between the two OS-  
416 treated groups were enriched towards a number of categories related to specialized metabolism  
417 (*e.g.* anthocyanin-containing compounds, phenylpropanoids), metal ion homeostasis, and  
418 responses to various stimuli (*e.g.* sucrose, gibberellin, ultraviolet-B; Figure 7e; Table S8).

419 Both OS treatments induced a large number of DEGs at the later time points compared to  
420 their respective control groups, and GO enrichment analyses with these DEGs resulted in dozens  
421 of over-represented categories (Table S8). To identify possible differentially-influenced  
422 physiological processes between these two OS treatments, we combined the enriched GO terms  
423 from both sets of DEGs identified between W+W/W+OS<sub>B73</sub> and W+W/W+OS<sub>Xi502</sub> at either time  
424 points, and plotted their  $-\log(q)$  values from the two comparisons. At 2 hours post-treatment, we  
425 observed significant positive correlation ( $R^2 = 0.5282$ ) between the two sets of enriched GO



426 terms, suggesting that the comparable number of DEGs from these two comparisons were also  
427 mostly involved in similar sets of physiological processes (Fig. 7f). Interestingly, identification  
428 of GO terms that significantly deviated from this generally positive trend demonstrated that a  
429 number of protein kinase activity and phosphorylation-related terms were preferentially enriched  
430 among W+W/W+OS<sub>Xi502</sub> DEGs (Fig. 7f). At 6 hours post-treatment, we were not able to find the  
431 same kind of positive correlation ( $R^2 = 0.2749$ ), indicating that these two sets of DEGs, though  
432 similar in number, were involved in distinct physiological processes. Indeed, when qualitatively  
433 comparing the significantly enriched GO terms from these DEG sets, while almost all GO terms  
434 enriched among W+W/W+OS<sub>B73</sub> DEGs were also found over-represented among  
435 W+W/W+OS<sub>Xi502</sub> DEGs, this latter group of DEGs was also enriched for 65 other GO categories,  
436 involved in diverse processes including proline transport, phospholipid metabolism, terpenoid  
437 metabolism, and plant-type hypersensitive responses (Fig. 7g).

#### 438 **Inducible phytohormone dynamics is affected by both the source of oral secretions and the** 439 **host plant genotype**

440 To further explore the dynamic plant response towards FAW OS collected from different source  
441 diet, we treated B73 and Xi502 seedling leaves with water (as control), OS<sub>B73</sub>, or OS<sub>Xi502</sub> after  
442 mechanic wounding. Local treated tissues were collected 2 hours post-treatment, and used for  
443 simultaneous quantification of five different phytohormones (Table S9). The epitomic insect  
444 defense hormone JA was significantly induced in B73 leaves after OS<sub>Xi502</sub> but not OS<sub>B73</sub>  
445 treatment. Surprisingly, though the constitutive JA level was significantly higher in Xi502, it was  
446 significantly depleted by OS<sub>Xi502</sub> treatment, while OS<sub>B73</sub> treatment induced a weaker and  
447 insignificant reduction as well (Fig 8a). The similar pattern was also observed for the bioactive  
448 JA-Ile conjugate, and the JA-Ile/JA ratio showed no significant difference across the board (Fig  
449 8b,c). Content of another phytohormone that has been extensively associated with defense  
450 against chewing herbivores, abscisic acid (ABA), was induced only by OS<sub>B73</sub> but not OS<sub>Xi502</sub>,  
451 though this induction is only statistically significant in B73. By contrast, only OS<sub>Xi502</sub> treatment  
452 could induce significant indole-3-acetic acid accumulation in the two hosts (Fig 8e).  
453 Interestingly, salicylic acid (SA), which often plays counteracting role against JA in plant  
454 defense responses, was significantly depleted in B73 after OS<sub>Xi502</sub> treatment and in Xi502 after  
455 OS<sub>B73</sub> treatment, two scenarios that less likely occurring under natural conditions (Fig 8f). In  
456 congruence with the results of post-OS-treatment transcriptomics analyses, phytohormone



457 dynamics also clearly support that OS<sub>B73</sub> and OS<sub>Xi502</sub> have distinct host response elicitation  
458 activity profile. Furthermore, by including both host plant genotypes in this experiment, we were  
459 able to demonstrate that B73 and Xi502 could respond differently even towards the same source  
460 of OS treatment (as in the cases of JA and JA-Ile), underlying that the host plant response is a  
461 function of both the source of OS and the host genotype.

462

## 463 **Discussion**

464 As a successful specialist herbivore, FAW has evolved an arsenal of counter-defense  
465 mechanisms including defensive metabolite detoxification and inducible response suppression to  
466 promote its own survival and development on the preferred host plant species (Maag *et al.*, 2014;  
467 Wouters *et al.*, 2014; De Lange *et al.*, 2020; Israni *et al.*, 2020). These specialized counter-  
468 defense measures of FAW posed additional challenges to developing genetically FAW-resistant  
469 maize cultivars by harnessing the innate maize biochemical defense. Nevertheless, natural  
470 variation within maize has led to identification and breeding of maize inbred lines with enhanced  
471 FAW resistance, and such resistance has often been attributed to specific defensive biomolecules  
472 such as the Mir1-CP protease in Mp708 and the constitutively accumulated FAW-toxic  
473 HDMBOA-Glc among tropical maize inbreds (Pechan *et al.*, 2000; Meihls *et al.*, 2013).  
474 However, even in the classic FAW-resistant inbred Mp708, the inducible accumulation of Mir1-  
475 CP is not the only trait potentially associated with the heightened resistance phenotype, such that  
476 it also has constitutively higher level of jasmonates and volatile terpenoids (Shivaji *et al.*, 2010;  
477 Smith *et al.*, 2012). Indeed, successful defense against insect herbivores require a suite of  
478 concerted response as implicated by the transcriptomic and metabolomic dynamic demonstrated  
479 here in Xi502, as well as in previous studies on maize attacked by generalist *Spodoptera* species,  
480 and one would expect that a singular change on any specific branch of the defense response  
481 would either be insufficient to stop the herbivores or impose a strong enough selective pressure  
482 that a counteracting mechanism would quickly arise in the insect populations (Fig. 2-5; (Erb *et al.*,  
483 2009; Tzin *et al.*, 2017). Therefore, the molecular signaling network that regulates the  
484 herbivore-inducible responses in plants likely presents an important battleground for the arms  
485 race between insect herbivores and their host plants. In support of this hypothesis, we found the  
486 largest number of DEGs between the two FAW OS treatment groups at 15 minutes post-  
487 treatment when the response has yet to propagate to the downstream executor genes (Fig. 7d,e).

488 Furthermore, we showed that protein kinase activity and phosphorylation-related GO terms were  
489 preferentially enriched in OS<sub>Xi502</sub> treatment groups at 2 hours post-treatment (Fig. 7f). This  
490 observation suggested that OS<sub>Xi502</sub> could induce a more pronounced activation of the MAPK  
491 and/or calcium-dependent protein kinase (CDPK) signaling cascade in maize, which function  
492 upstream to the plant JAZ proteins targeted by the HARP1 effector recently identified in cotton  
493 bollworm (Chen *et al.*, 2019). Since the only variable between these two groups was the  
494 genotype of host plants that were used to produce the OS, we speculate that a progenitor plant  
495 molecule may be ingested and modified by the FAW larvae, and secreted back into the plant cell  
496 as an effector molecule to interfere with the MAPK/CDPK signaling cascade, and the differential  
497 elicitation activity between OS<sub>B73</sub> and OS<sub>Xi502</sub> could be explained by the presence of  
498 modification-resistant progenitor molecule in Xi502. In result, OS<sub>Xi502</sub> would contain no (or less)  
499 functional effector molecules so that the herbivory-inducible signaling cascade could function as  
500 norm (Fig. 9a,b). Alternatively, Xi502 may contain a yet unknown inhibitor molecule that  
501 suppress the biosynthesis and/or secretion of insect-produced effectors (Fig. 9c,d). Furthermore,  
502 the strength of defense signals in this system is not exclusively determined by the eliciting  
503 activity of FAW OS, as we demonstrated that different host plant genotypes could behave in  
504 contrasting fashions even when treated by the same OS (Fig 8a,b). This would suggest that  
505 allelic variation in the hypothetical effector-targeted protein kinases between B73 and Xi502  
506 could also play a role in the differential FAW-inducibility in these two genotypes.

507 The initial observation that Xi502 showed elevated resistance against FAW as well as  
508 shorter growth stature had prompted consideration of possible growth-defense tradeoff in this  
509 particular genotype (Fig. 1). In support of this idea, Xi502 did contain higher constitutive level of  
510 total benzoxazinoids and JA than B73 (Fig. 4&5). However, almost all of the defense-related  
511 genes we have examined specifically showed higher constitutive expression level in the  
512 susceptible B73. The consistent trend was that Xi502 demonstrated stronger defense inducibility  
513 upon FAW attack at all of the three aforementioned levels, strongly suggesting that the FAW-  
514 resistance phenotype was at least in part due to genetic variation in its herbivore-responsive  
515 signaling network (Fig. 3&4). Hence, we can neither support or refute the hypothetical linkage  
516 between resistance and growth in Xi502 with these contradicting evidences between gene  
517 expression, jasmonates levels, and benzoxazinoids contents. Ideally, this hypothesis could be

518 better tested by examining the FAW-resistance and growth stature phenotypes among the  
519 parental, sibling, and segregating filial lines of Xi502.

520 In addition to multi-level characterization of plant responses to FAW attack, we also  
521 examined the transcriptomic responses of the larvae feeding on these two host genotypes with  
522 the goal of depicting a more complete picture of this plant-insect interaction system. Though the  
523 larvae under different feeding regimes were undiscernible to phenotypic observations after 24  
524 hours of feeding, significant re-programing had readily occurred at the transcriptomic level (Fig.  
525 6). Enrichment towards sensory and reproductive developmental processes among B73-specific  
526 up-regulated genes presented clear evidence of better larval development on this susceptible host  
527 (Table S6). This interpretation was further supported by the B73-specific down-regulation of  
528 various nutrient metabolic processes (Table S6). Unexpectedly, many detoxification-related  
529 genes, with the exception of aromatic compound breakdown-related genes, also showed more  
530 significant change in expression in B73-fed larvae compared to their Xi502-fed siblings, though  
531 the latter group was exposed to much more hostile defensive metabolites in its diet (Fig. 6d,e).  
532 This may suggest that Xi502 has evolved mechanisms to suppress the expression of FAW  
533 detoxification genes. Host-adapted insect transcriptomic responses have been hypothesized to  
534 link with important biological functions such as host manipulation and nutrient assimilation  
535 (Petre *et al.*, 2020). Among the handful of transcriptomics studies examining herbivore responses  
536 on different host plants, the transcriptome dynamics appeared to be greater in chewing  
537 herbivores (~5% DEG) than in phloem-suckers (0.1~1% DEG; (Birnbaum *et al.*, 2017; Mathers  
538 *et al.*, 2017; Boulain *et al.*, 2019; Tan *et al.*, 2019). The 1,662 (7.1%) and 485 (2.1%) DEGs  
539 between B73- and Xi502-fed FAW larvae compared to their siblings grown on artificial diet  
540 underscored the significant influence of host plant genotype on the herbivore transcriptome  
541 plasticity, and in this case, a large number of DEGs were not directly linked to host adaptation  
542 but rather involved in developmental processes of the insects themselves, even with the transient  
543 feeding period (24 hours) on each host plant (Fig. 6a,b).

544 Finally, simulation of insect herbivory by wounding and OS treatment is a common  
545 practice in plant-insect interaction research (Waterman *et al.*, 2019). Our result of differential  
546 elicitation activity of FAW OS collected from larvae fed with different host plant genotypes  
547 should raise the caution of how the OS used in such simulated herbivory experiments were  
548 prepared, and whether this preparation process could introduce any artifact into the results of

549 these experiments. As researchers look further into plant natural variation for sustainable insect  
550 pest management solutions, the multi-faceted influences of host genotypic variation on plant-  
551 insect interactions must be carefully and thoroughly evaluated.

552

### 553 **Data availability statement**

554 All RNAseq clean reads are uploaded to NCBI online depository in fastq format and accessible  
555 under the following BioProjects: PRJNA723461 – FAW-infested maize leaf transcriptomes;  
556 PRJNA729598 – FAW larvae transcriptomes; PRJNA730324 – FAW OS-treated maize leaf  
557 transcriptomes.

558

### 559 **Acknowledgements**

560 The authors would like to thank Drs. Jianbin Yan and Yutao Xiao for generous supply for plant  
561 and insect materials. We would also like to thank Drs. Suhua Li, Xiaowen Shi, Jian Yan, and  
562 Georg Jander for constructive suggestions in preparing the manuscript. This work has been  
563 financially supported by National Natural Science Foundation of China (Award 32000229 to  
564 S.Z. and Award 31772179 to J.Q.), Shenzhen Peacock Plan (KQTD20180411143628272), and  
565 Shenzhen Excellent Science & Technology Innovation Talent Project  
566 (RCBS20200714114918029).

567

### 568 **Author contributions**

569 This project is conceived by SuM, WL, and SZ. SuM performed bioassays and tissue preparation  
570 for omics experiments, and analyzed bioassay results. XFL analyzed transcriptomics data. JQ  
571 performed phytohormone and benzoxazinoid measurements and analyzed data from these  
572 experiments. All authors collaborated on the manuscript preparation.

573

## 574 References

- 575 **Abel CA, Wilson RL, Wiseman BR, White WH, Davis FM. 2000.** Conventional resistance of  
576 experimental maize lines to corn earworm (Lepidoptera: Noctuidae), fall armyworm  
577 (Lepidoptera: Noctuidae), southwestern corn borer (Lepidoptera: Crambidae), and  
578 sugarcane borer (Lepidoptera: Crambidae). *J Econ Entomol* **93**(3): 982-988.
- 579 **Acevedo FE, Smith P, Peiffer M, Helms A, Tooker J, Felton GW. 2019.** Phytohormones in fall  
580 armyworm saliva modulate defense responses in plants. *J Chem Ecol* **45**(7): 598-609.
- 581 **Acevedo FE, Stanley BA, Stanley A, Peiffer M, Luthe DS, Felton GW. 2017.** Quantitative  
582 proteomic analysis of the fall armyworm saliva. *Insect Biochem Mol Biol* **86**: 81-92.
- 583 **Ahmad S, Veyrat N, Gordon-Weeks R, Zhang Y, Martin J, Smart L, Glauser G, Erb M, Flors V,  
584 Frey M, et al. 2011.** Benzoxazinoid metabolites regulate innate immunity against aphids  
585 and fungi in maize. *Plant Physiol* **157**(1): 317-327.
- 586 **Anders S, Pyl PT, Huber W. 2015.** HTSeq--a Python framework to work with high-throughput  
587 sequencing data. *Bioinformatics* **31**(2): 166-169.
- 588 **Birnbaum SSL, Rinker DC, Gerardo NM, Abbot P. 2017.** Transcriptional profile and differential  
589 fitness in a specialist milkweed insect across host plants varying in toxicity. *Mol Ecol*  
590 **26**(23): 6742-6761.
- 591 **Boulain H, Legeai F, Jaquierey J, Guy E, Morliere S, Simon JC, Sugio A. 2019.** Differential  
592 Expression of Candidate Salivary Effector Genes in Pea Aphid Biotypes With Distinct  
593 Host Plant Specificity. *Front Plant Sci* **10**: 1301.
- 594 **Buntin GD, All JN, Lee RD, Wilson DM. 2004.** Plant-incorporated *Bacillus thuringiensis*  
595 resistance for control of fall armyworm and corn earworm (Lepidoptera: Noctuidae) in  
596 corn. *J Econ Entomol* **97**(5): 1603-1611.
- 597 **Chen CY, Liu YQ, Song WM, Chen DY, Chen FY, Chen XY, Chen ZW, Ge SX, Wang CZ, Zhan S, et  
598 al. 2019.** An effector from cotton bollworm oral secretion impairs host plant defense  
599 signaling. *Proc Natl Acad Sci U S A* **116**(28): 14331-14338.
- 600 **Chuang WP, Herde M, Ray S, Castano-Duque L, Howe GA, Luthe DS. 2014.** Caterpillar attack  
601 triggers accumulation of the toxic maize protein RIP2. *New Phytol* **201**(3): 928-939.
- 602 **De Lange ES, Laplanche D, Guo H, Xu W, Vlimant M, Erb M, Ton J, Turlings TCJ. 2020.**  
603 *Spodoptera frugiperda* caterpillars suppress herbivore-induced volatile emissions in  
604 maize. *J Chem Ecol* **46**(3): 344-360.
- 605 **Dobin A, Davis CA, Schlesinger F, Drenkow J, Zaleski C, Jha S, Batut P, Chaisson M, Gingeras  
606 TR. 2013.** STAR: ultrafast universal RNA-seq aligner. *Bioinformatics* **29**(1): 15-21.
- 607 **Dowd PF, Naumann TA, Johnson ET, Price NPJ. 2020.** A maizewin protein confers enhanced  
608 antiinsect and antifungal resistance when the gene is transgenically expressed in maize  
609 callus. *Plant Gene* **24**: 100259.
- 610 **Erb M, Flors V, Karlen D, de Lange E, Planchamp C, D'Alessandro M, Turlings TC, Ton J. 2009.**  
611 Signal signature of aboveground-induced resistance upon belowground herbivory in  
612 maize. *Plant J* **59**(2): 292-302.
- 613 **Erb M, Reymond P. 2019.** Molecular interactions between plants and insect herbivores. *Annu  
614 Rev Plant Biol* **70**: 527-557.

- 615 **Farias JR, Horikoshi RJ, Santos AC, Omoto C. 2014.** Geographical and temporal variability in  
616 susceptibility to Cry1F toxin from *Bacillus thuringiensis* in *Spodoptera frugiperda*  
617 (Lepidoptera: Noctuidae) populations in Brazil. *J Econ Entomol* **107**(6): 2182-2189.
- 618 **Glauser G, Marti G, Villard N, Doyen GA, Wolfender JL, Turlings TC, Erb M. 2011.** Induction and  
619 detoxification of maize 1,4-benzoxazin-3-ones by insect herbivores. *Plant J* **68**(5): 901-  
620 911.
- 621 **Goergen G, Kumar PL, Sankung SB, Togola A, Tamo M. 2016.** First report of outbreaks of the  
622 fall armyworm *Spodoptera frugiperda* (J E Smith) (Lepidoptera, Noctuidae), a new alien  
623 invasive pest in West and Central Africa. *PLoS One* **11**(10): e0165632.
- 624 **Israni B, Wouters FC, Luck K, Seibel E, Ahn SJ, Paetz C, Reinert M, Vogel H, Erb M, Heckel DG,**  
625 **et al. 2020.** The fall armyworm *Spodoptera frugiperda* utilizes specific UDP-  
626 glycosyltransferases to inactivate maize defensive benzoxazinoids. *Front Physiol* **11**:  
627 604754.
- 628 **Jiang B, Siregar U, Willeford KO, Luthe DS, Williams WP. 1995.** Association of a 33-kilodalton  
629 cysteine proteinase found in corn callus with the inhibition of fall armyworm larval  
630 growth. *Plant Physiol* **108**(4): 1631-1640.
- 631 **Jiao Y, Peluso P, Shi J, Liang T, Stitzer MC, Wang B, Campbell MS, Stein JC, Wei X, Chin CS, et**  
632 **al. 2017.** Improved maize reference genome with single-molecule technologies. *Nature*  
633 **546**(7659): 524-527.
- 634 **Jin M, Yang Y, Shan Y, Chakrabarty S, Cheng Y, Soberon M, Bravo A, Liu K, Wu K, Xiao Y. 2021.**  
635 Two ABC transporters are differentially involved in the toxicity of two *Bacillus*  
636 *thuringiensis* Cry1 toxins to the invasive crop-pest *Spodoptera frugiperda* (J. E. Smith).  
637 *Pest Manag Sci.* **77**(3): 1492-1501.
- 638 **Kennedy CJ, Tierney KB 2013.** Xenobiotic protection/resistance mechanisms in organisms. In:  
639 Laws EA ed. *Environmental Toxicology*. Berlin: Springer, 689-721.
- 640 **Maag D, Dalvit C, Thevenet D, Kohler A, Wouters FC, Vassao DG, Gershenzon J, Wolfender JL,**  
641 **Turlings TC, Erb M, et al. 2014.** 3-beta-D-Glucopyranosyl-6-methoxy-2-benzoxazolinone  
642 (MBOA-N-Glc) is an insect detoxification product of maize 1,4-benzoxazin-3-ones.  
643 *Phytochemistry* **102**: 97-105.
- 644 **Mathers TC, Chen Y, Kaithakottil G, Legeai F, Mugford ST, Baa-Puyoulet P, Bretaudeau A,**  
645 **Clavijo B, Colella S, Collin O, et al. 2017.** Rapid transcriptional plasticity of duplicated  
646 gene clusters enables a clonally reproducing aphid to colonise diverse plant species.  
647 *Genome Biol* **18**(1): 27.
- 648 **Meihls LN, Handrick V, Glauser G, Barbier H, Kaur H, Haribal MM, Lipka AE, Gershenzon J,**  
649 **Buckler ES, Erb M, et al. 2013.** Natural variation in maize aphid resistance is associated  
650 with 2,4-dihydroxy-7-methoxy-1,4-benzoxazin-3-one glucoside methyltransferase  
651 activity. *Plant Cell* **25**(6): 2341-2355.
- 652 **Midega CAO, Pittchar JO, Pickett JA, Hailu GW, Khan ZR. 2018.** A climate-adapted push-pull  
653 system effectively controls fall armyworm, *Spodoptera frugiperda* (J E Smith), in maize  
654 in east Africa *Crop Protection* **105**: 10-15.
- 655 **Ni X, Chen Y, Hibbard BE, Wilson JP, Williams WP, Buntin GD, Ruberson JR, Li X. 2011.** Foliar  
656 resistance to fall armyworm in corn germplasm lines that confer resistance to root- and  
657 ear-feeding insects. *Florida Entomologist* **94**(4): 971-981.



- 658 **Ni X, Xu W, Blanco MH, Williams WP. 2013.** Evaluation of fall armyworm resistance in maize  
659 germplasm lines using visual leaf injury rating and predator survey. *Insect Sci* **21**: 541-  
660 555.
- 661 **Ni X, Xu W, Blanco MH, Wilson JP. 2012.** Evaluation of corn germplasm lines for multiple ear-  
662 colonizing insect and disease resistance. *J Econ Entomol* **105**(4): 1457-1464.
- 663 **Pechan T, Cohen A, Williams WP, Luthe DS. 2002.** Insect feeding mobilizes a unique plant  
664 defense protease that disrupts the peritrophic matrix of caterpillars. *Proc Natl Acad Sci*  
665 *U S A* **99**(20): 13319-13323.
- 666 **Pechan T, Jiang B, Steckler D, Ye L, Lin L, Luthe DS, Williams WP. 1999.** Characterization of  
667 three distinct cDNA clones encoding cysteine proteinases from maize (*Zea mays* L.)  
668 callus. *Plant Mol Biol* **40**(1): 111-119.
- 669 **Pechan T, Ye L, Chang Y, Mitra A, Lin L, Davis FM, Williams WP, Luthe DS. 2000.** A unique 33-  
670 kD cysteine proteinase accumulates in response to larval feeding in maize genotypes  
671 resistant to fall armyworm and other Lepidoptera. *Plant Cell* **12**(7): 1031-1040.
- 672 **Petre B, Lorrain C, Stukenbrock EH, Duplessis S. 2020.** Host-specialized transcriptome of plant-  
673 associated organisms. *Curr Opin Plant Biol* **56**: 81-88.
- 674 **Poretzky E, Dressano K, Weckwerth P, Ruiz M, Char SN, Shi D, Abagyan R, Yang B, Huffaker A.**  
675 **2020.** Differential activities of maize plant elicitor peptides as mediators of immune  
676 signaling and herbivore resistance. *Plant J* **104**(6): 1582-1602.
- 677 **Qi J, Sun G, Wang L, Zhao C, Hettenhausen C, Schuman MC, Baldwin IT, Li J, Song J, Liu Z, et al.**  
678 **2016.** Oral secretions from *Mythimna separata* insects specifically induce defence  
679 responses in maize as revealed by high-dimensional biological data. *Plant Cell Environ*  
680 **39**(8): 1749-1766.
- 681 **Ray S, Alves PC, Ahmad I, Gaffoor I, Acevedo FE, Peiffer M, Jin S, Han Y, Shakeel S, Felton GW,**  
682 **et al. 2016.** Turnabout is fair play: herbivory-induced plant chitinases excreted in fall  
683 armyworm frass suppress herbivore defenses in maize. *Plant Physiol* **171**(1): 694-706.
- 684 **Richter A, Powell AF, Mirzaei M, Wang LJ, Movahed N, Miller JK, Pineros MA, Jander G. 2021.**  
685 Indole-3-glycerolphosphate synthase, a branchpoint for the biosynthesis of tryptophan,  
686 indole, and benzoxazinoids in maize. *Plant J* **106**(1): 245-257.
- 687 **Shivaji R, Camas A, Ankala A, Engelberth J, Tumlinson JH, Williams WP, Wilkinson JR, Luthe**  
688 **DS. 2010.** Plants on constant alert: elevated levels of jasmonic acid and jasmonate-  
689 induced transcripts in caterpillar-resistant maize. *J Chem Ecol* **36**(2): 179-191.
- 690 **Smith WE, Shivaji R, Williams WP, Luthe DS, Sandoya GV, Smith CL, Sparks DL, Brown AE.**  
691 **2012.** A maize line resistant to herbivory constitutively releases (E)-beta-caryophyllene. *J*  
692 *Econ Entomol* **105**(1): 120-128.
- 693 **Sun X-x, Hu C-x, Jia H-r, Wu Q-l, Shen X-j, Zhao S-y, Jiang Y-y, Wu K-m. 2021.** Case study on the  
694 first immigration of fall armyworm, *Spodoptera frugiperda* invading into China. *J Inte Agr*  
695 **20**(3): 664-672.
- 696 **Tan WH, Acevedo T, Harris EV, Alcaide TY, Walters JR, Hunter MD, Gerardo NM, de Roode JC.**  
697 **2019.** Transcriptomics of monarch butterflies (*Danaus plexippus*) reveals that toxic host  
698 plants alter expression of detoxification genes and down-regulate a small number of  
699 immune genes. *Mol Ecol* **28**(22): 4845-4863.
- 700 **Tian T, Liu Y, Yan H, You Q, Yi X, Du Z, Xu W, Su Z. 2017.** agriGO v2.0: a GO analysis toolkit for  
701 the agricultural community, 2017 update. *Nucleic Acids Res* **45**(W1): W122-W129.



- 702 **Tzin V, Hojo Y, Strickler SR, Bartsch LJ, Archer CM, Ahern KR, Zhou S, Christensen SA, Galis I,**  
703 **Mueller LA, et al. 2017.** Rapid defense responses in maize leaves induced by *Spodoptera*  
704 *exigua* caterpillar feeding. *J Exp Bot* **68**(16): 4709-4723.
- 705 **Waterman JM, Cazzonelli CI, Hartley SE, Johnson SN. 2019.** Simulated herbivory: the key to  
706 disentangling plant defence responses. *Trends Ecol Evol* **34**(5): 447-458.
- 707 **Williams WP, Davis FM, Windham GL. 1990.** Registration of Mp708 germplasm line of maize  
708 *Crop Science* **30**: 757.
- 709 **Wouters FC, Reichelt M, Glauser G, Bauer E, Erb M, Gershenzon J, Vassao DG. 2014.**  
710 Reglucosylation of the benzoxazinoid DIMBOA with inversion of stereochemical  
711 configuration is a detoxification strategy in lepidopteran herbivores. *Angew Chem Int Ed*  
712 *Engl* **53**(42): 11320-11324.
- 713 **Wu JQ, Hettenhausen C, Meldau S, Baldwin IT. 2007.** Herbivory rapidly activates MAPK  
714 signaling in attacked and unattacked leaf regions but not between leaves of *Nicotiana*  
715 *attenuata*. *Plant Cell* **19**(3): 1096-1122.
- 716 **Yang X, Wyckhuys KAG, Jia X, Nie F, Wu K. 2021.** Fall armyworm invasion heightens pesticide  
717 expenditure among Chinese smallholder farmers. *J Environ Manage* **282**: 111949.
- 718 **Zhang C, Li J, Li S, Ma C, Liu H, Wang L, Qi J, Wu J. 2021.** ZmMPK6 and ethylene signalling  
719 negatively regulate the accumulation of anti-insect metabolites DIMBOA and DIMBOA-  
720 Glc in maize inbred line A188. *New Phytol* **229**(4): 2273-2287.
- 721 **Zhang L, Liu B, Zheng W, Liu C, Zhang D, Zhao S, Li Z, Xu P, Wilson K, Withers A, et al. 2020.**  
722 Genetic structure and insecticide resistance characteristics of fall armyworm  
723 populations invading China. *Mol Ecol Resour* **20**(6): 1682-1696.
- 724 **Zhou S, Richter A, Jander G. 2018.** Beyond defense: multiple functions of benzoxazinoids in  
725 maize metabolism. *Plant Cell Physiol* **59**(8): 1528-1537.
- 726 **Zhu C, Niu Y, Zhou Y, Guo J, Head GP, Price PA, Wen X, Huang F. 2019.** Survival and effective  
727 dominance level of a Cry1A.105/Cry2Ab2-dual gene resistant population of *Spodoptera*  
728 *frugiperda* (J.E. Smith) on common pyramided Bt corn traits. *Crop Protection* **115**: 84-91.  
729

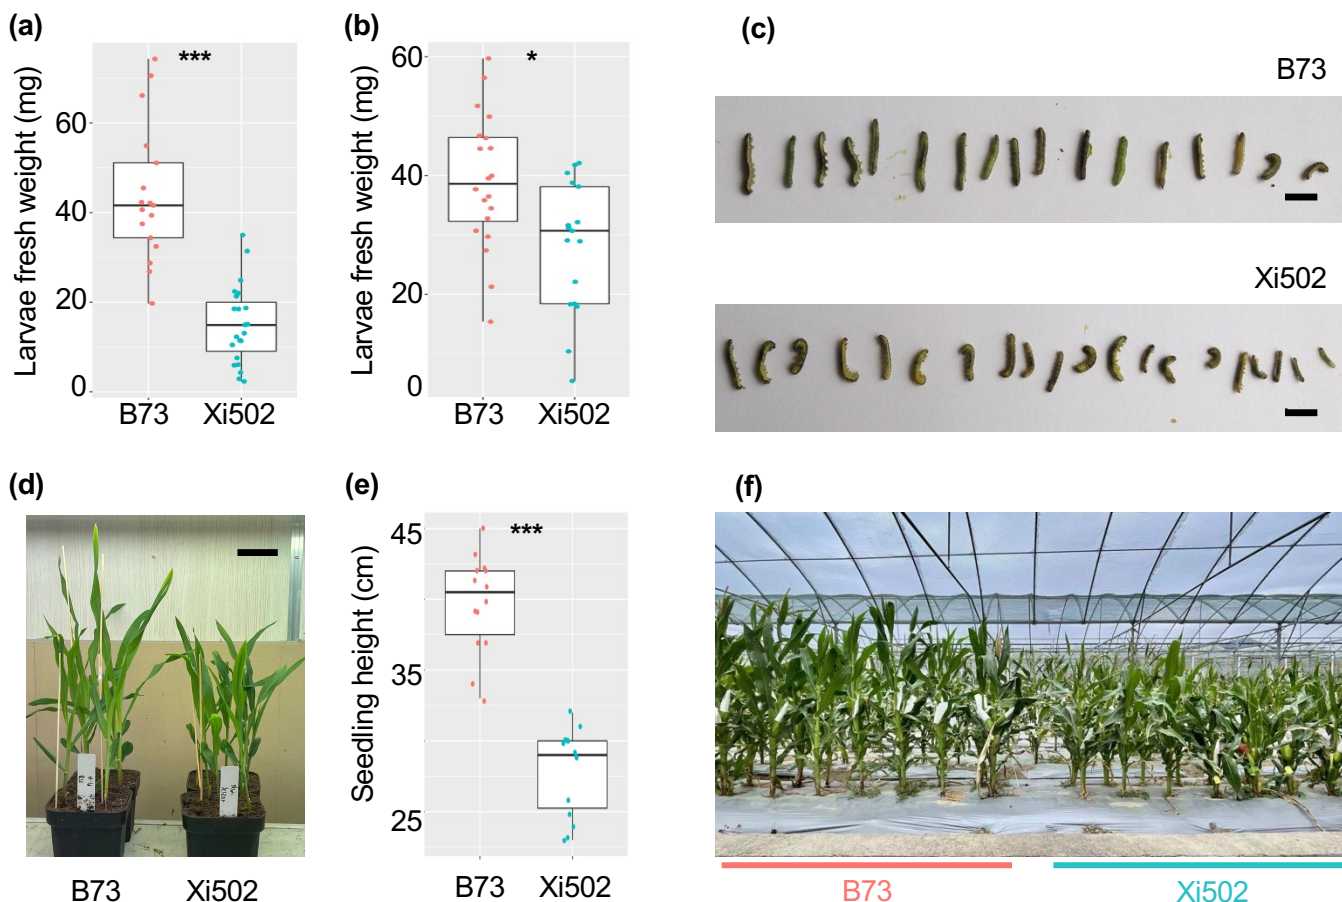

**Fig. 1. Phenotypic differences between B73 and Xi502.** (a, b) In two independent bioassays, FAW larvae grow significantly smaller on Xi502 than on B73 (\* $p < 0.05$ ; \*\*\* $p < 0.005$ ; Student's  $t$ -tests). The range, quartiles, and mean of either group are shown by the box-and-whisker plots, and the measurement of each larva is represented by a jitter dot. (c) Photographs of snap frozen FAW larvae corpses from the first round of bioassay (Scale bar = 1 cm). (d, e) B73 seedlings grow significantly taller than Xi502 at two-weeks post-sowing (\*\*\* $p < 0.005$ ; Student's  $t$ -test; Scale bar = 2 cm). (f) Mature B73 plants grow taller than Xi502 at anthesis stage.

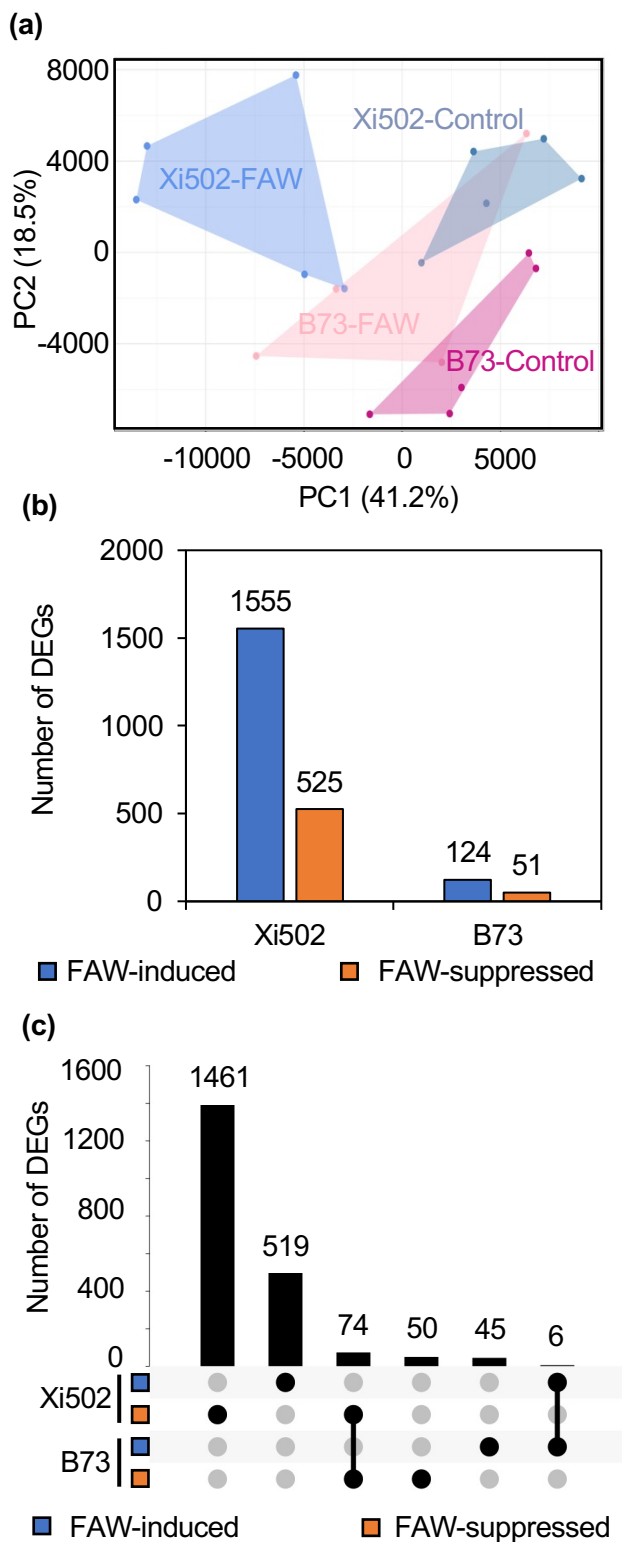

**Fig. 2. Untargeted comparative transcriptomic analyses of B73 and Xi502 leaves after 24 hours of fall armyworm infestation.** (a) PCA result of the RNAseq data from control and FAW-attacked B73 and Xi502 leaf tissue. (b) Summary of DEGs in Xi502 and B73 upon FAW attack. (c) Summary of shared and group-specific DEGs.

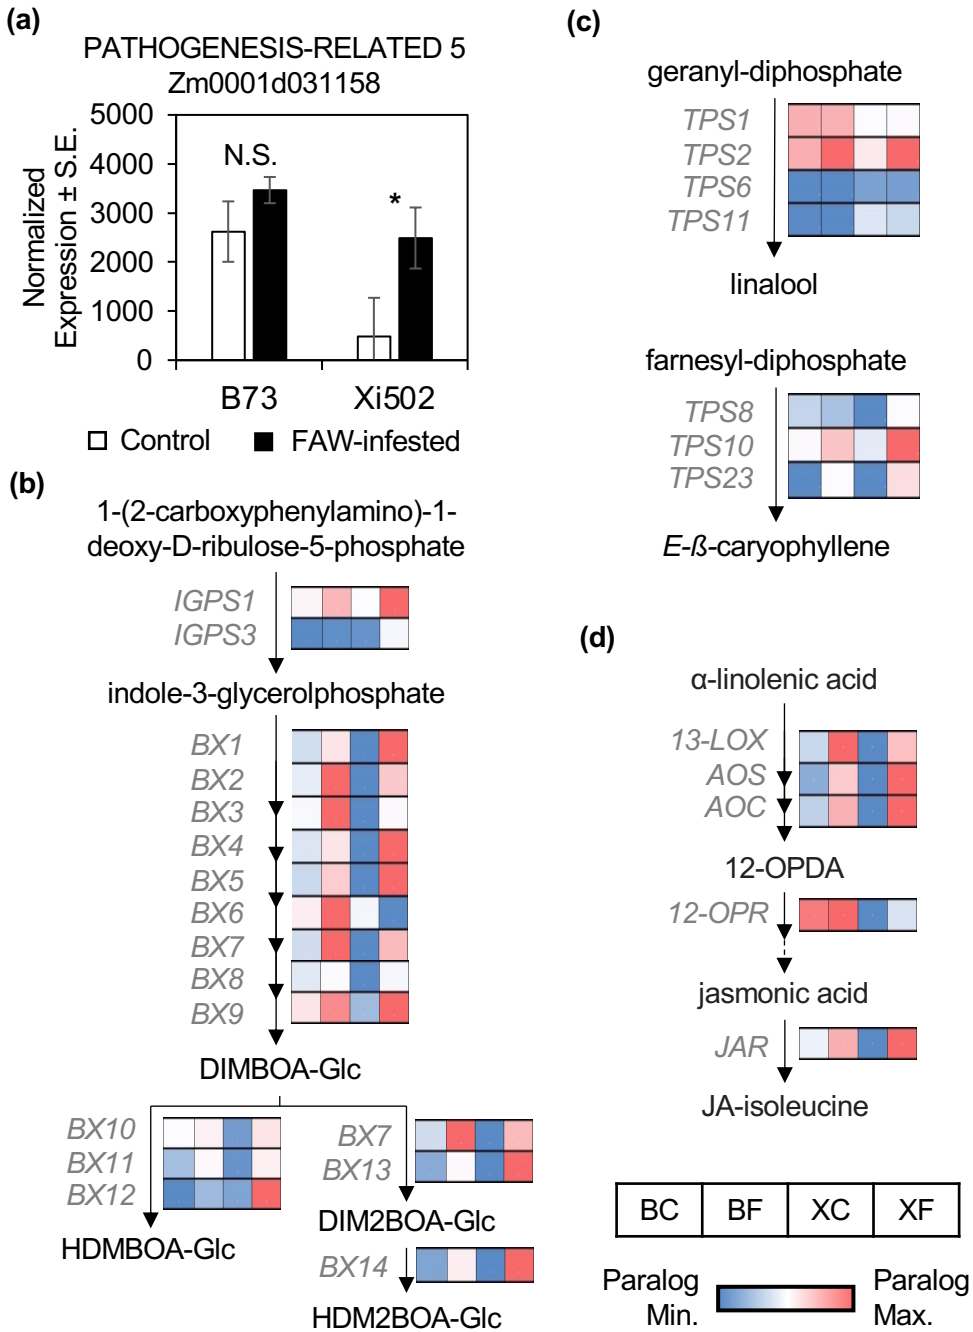

**Fig. 3. Targeted comparative transcriptomic analyses of B73 and Xi502 upon FAW attack.** (a) The maize *PATHOGENESIS-RELATED5* gene is only significantly induced by FAW attack in Xi502 (\*FDR < 0.05). N.S. = not significant; S.E. = standard errors. Normalized expression of benzoxazinoid (b), terpenoid (c), and jasmonic acid (d) biosynthetic genes in B73-control (BC), B73-FAW (BF), Xi502-control (XC), and Xi502-FAW (XF) are shown in a blue-to-red color scale. Note the range of the color scale extends from the minimum to the maximum of each set of functionally redundant paralogs (e.g. *IGPS1/3*; *BX8/9*; *BX10-12*; *TPS1/2/6/11*; *TPS8/10/23*). For jasmonic acid biosynthetic genes, only the paralog with the highest median normalized expression is visualized for simplicity purpose.

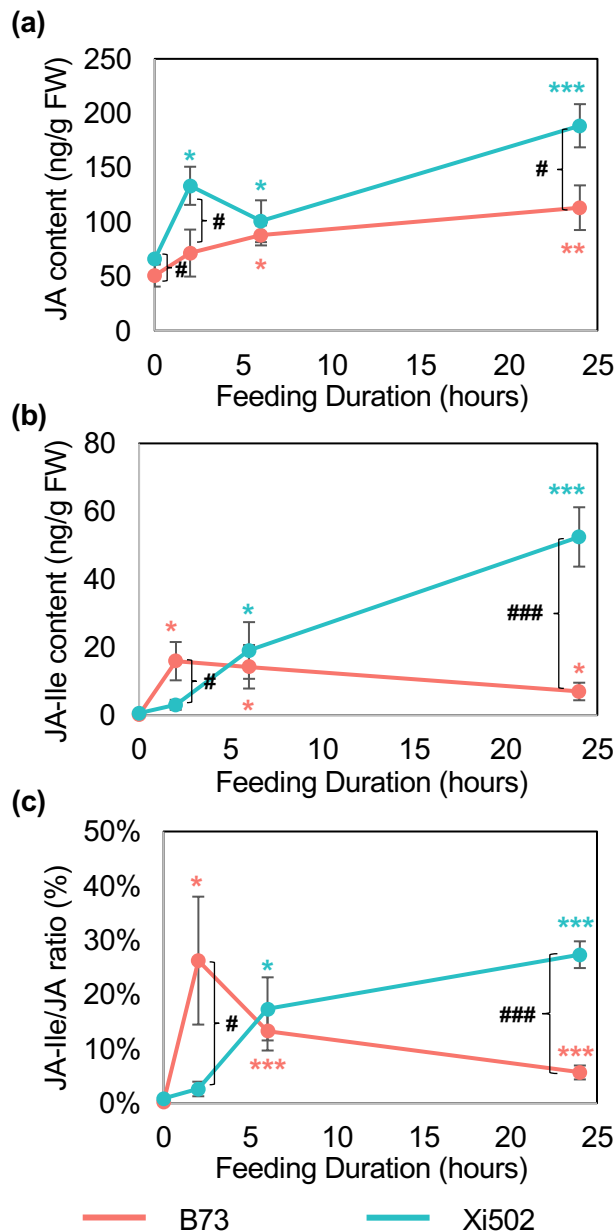

**Fig. 4. Phytohormone dynamics of B73 and Xi502 upon FAW attack.** Measurement of jasmonic acid (JA, a), jasmonate-isoleucine (JA-Ile, b), and their calculated ratio (c) in B73 (orange) and Xi502 (cyan) seedling leaves after 0, 2, 6, or 24 hours of FAW feeding. Significant differences from the 0 hour feeding control of either genotype are indicated by asterisks of their respective color code (\* $p < 0.05$ ; \*\* $p < 0.01$ ; \*\*\* $p < 0.005$ ; Student's  $t$ -tests). Significant differences between the two genotypes at each time point are indicated by pound signs (#  $p < 0.05$ ; ###  $p < 0.005$ ; Student's  $t$ -tests).  $N = 5$  for each time point and each genotype; error bars = standard errors.

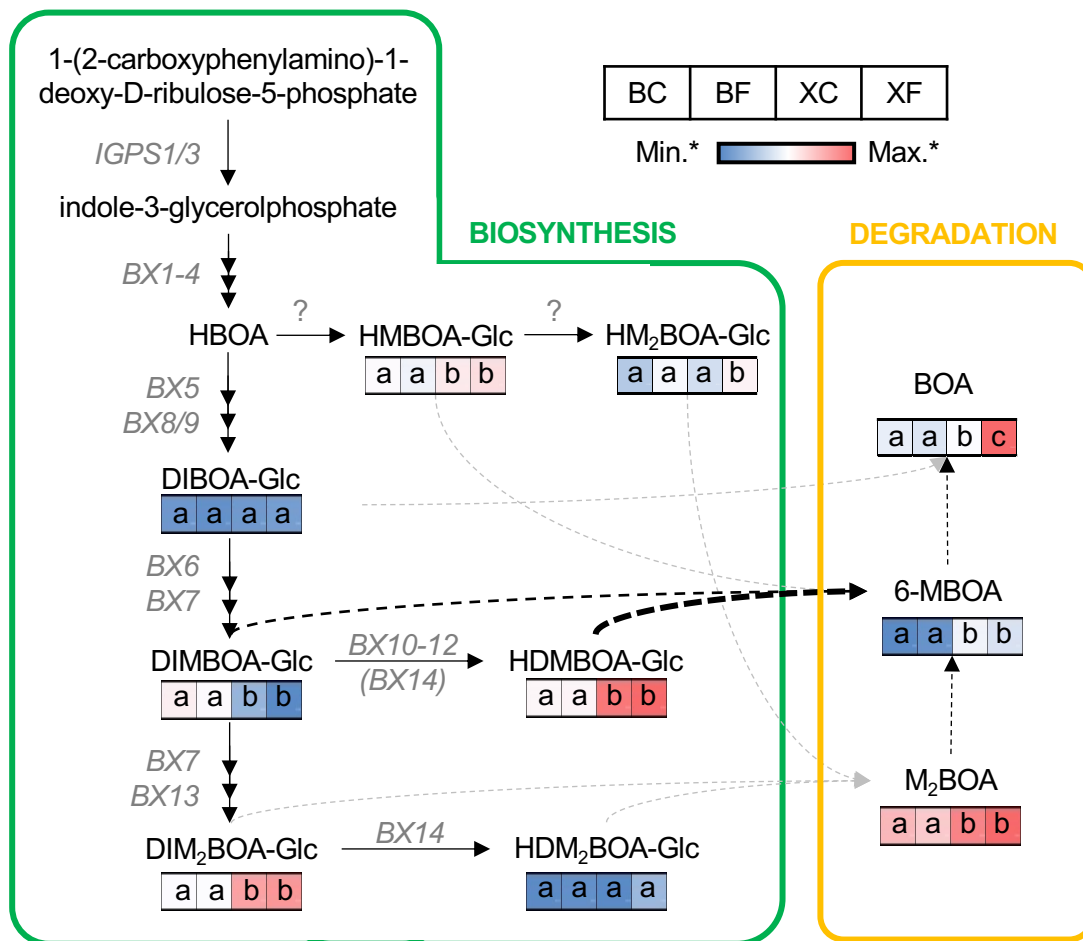

**Fig. 5. Constitutive and FAW-induced benzoxazinoid content in B73 and Xi502.**

Concentrations of benzoxazinoids in B73-control (BC), B73-FAW (BF), Xi502-control (XC), and Xi502-FAW (XF) are shown in a blue-to-red color scale. Note that bx compounds produced during biosynthesis (outlined in green) and non-enzymatic degradation (outlined in orange) are plotted on separate scales to better reflect differences between genotype-treatment groups. For each compound and the total benzoxazinoid, significant differences between groups (as determined by two-way ANOVA followed by TukeyHSD) are indicated by different letters in each cell. Known biosynthetic genes are listed at their catalytic steps, with un-confirmed enzymes represented by the question marks. Known and structurally inferred degradation processes are denoted by black and grey dotted arrows, respectively. The faster rate of degradation of HDMBOA-Glc compared to DIMBOA-Glc is reflected by the bolded arrow. BOA: benzoxazolin-2-one; DIBOA-Glc: 2,4-dihydroxy-1,4-benzoxazin-3-one glucoside; DIMBOA-Glc: 2,4-dihydroxy-7-methoxy-1,4-benzoxazin-3-one glucoside; DIM<sub>2</sub>BOA-Glc: 2,4-dihydroxy-7,8-dimethoxy-1,4-benzoxazin-3-one glucoside; HBOA: 2-hydroxy-benzoxazolin-2-one; HDMBOA-Glc: 2-hydroxy-4,7-dimethoxy-1,4-benzoxazin-3-one glucoside; HDM<sub>2</sub>BOA-Glc: 2-dihydroxy-4,7,8-trimethoxy-1,4-benzoxazin-3-one glucoside; HMBOA-Glc: 2-hydroxy-7-methoxy-2H-1,4-benzoxazin-3(4H)-one glucoside; HM<sub>2</sub>BOA-Glc: 2-hydroxy-7,8-dimethoxy-2H-1,4-benzoxazin-3(4H)-one glucoside; 6-MBOA: 6-methoxy-benzoxazolin-2-one; M<sub>2</sub>BOA: 6,7-dimethoxy-benzoxazolin-2-one.

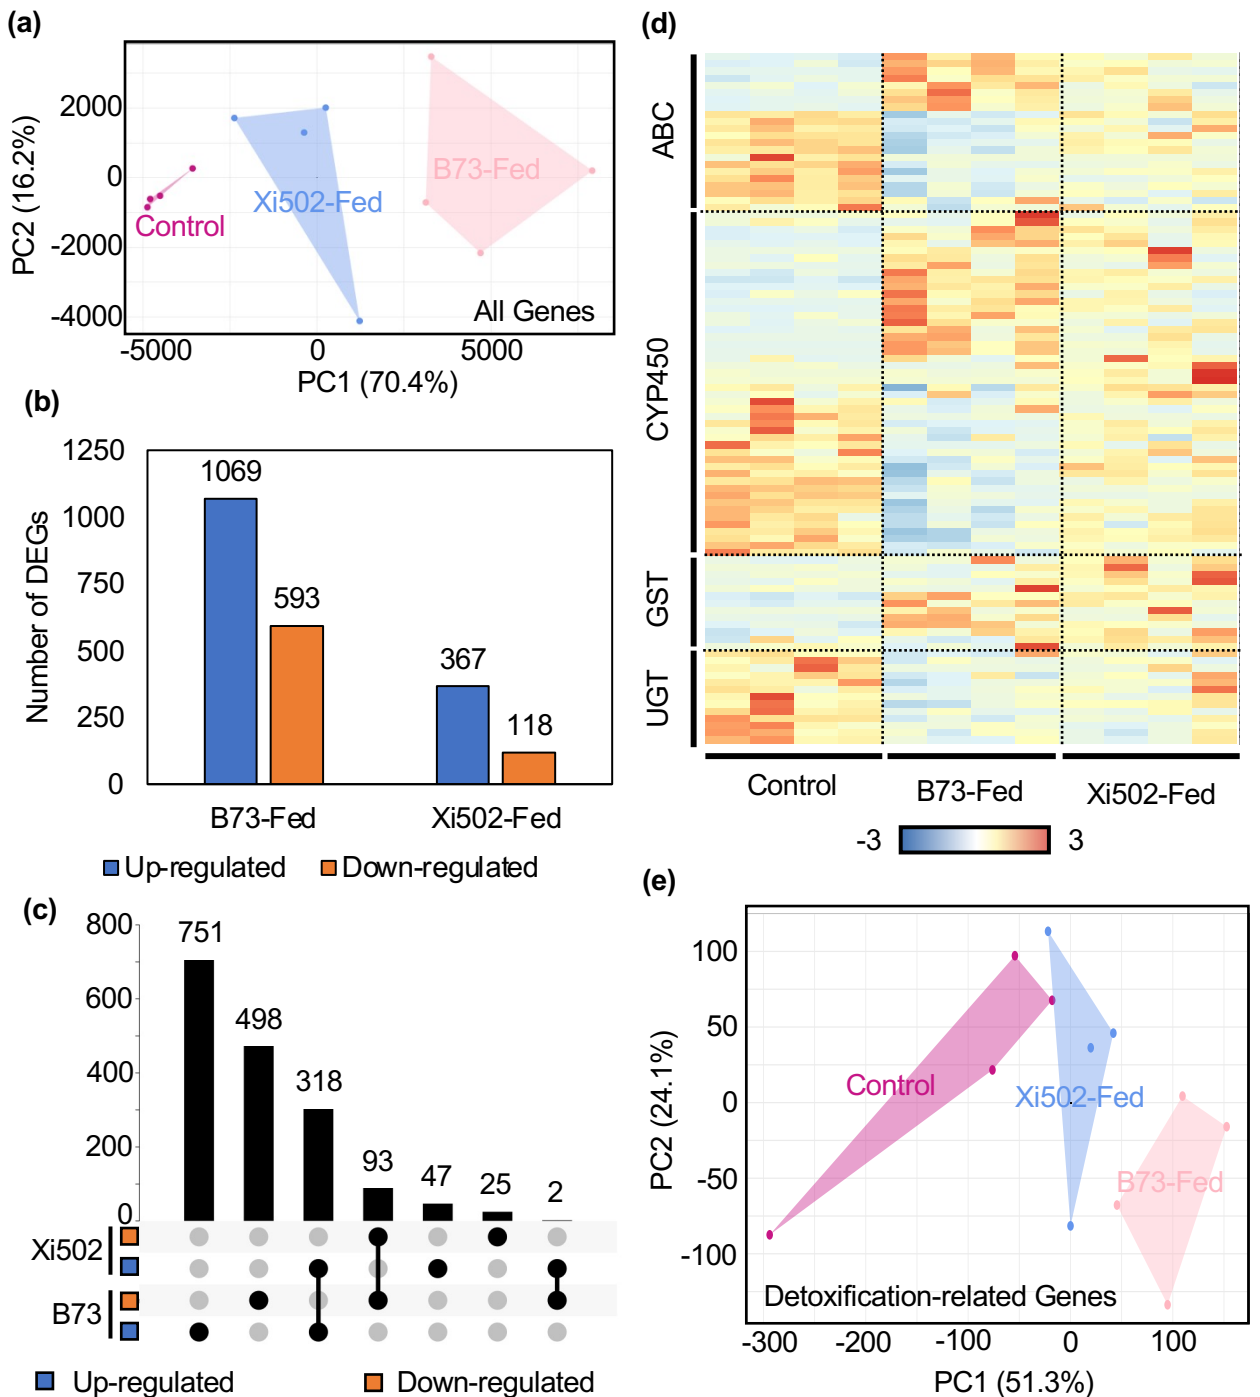

**Fig. 6. Untargeted comparative transcriptomic analyses of FAW larvae after 24 hours feeding on B73 or Xi502 leaves.** (a) PCA result of all expressed genes from FAW larvae feeding on artificial diet (Control), B73 seedlings, or Xi502 seedlings. (b) Summary of DEGs in FAW larvae fed on different diet. (c) Summary of shared and group-specific DEGs. (d) Normalized expression of potential detoxification-related genes in each diet group. ABC: ATP-binding cassette-containing transporters; CYP450: cytochrome P450-dependent mono-oxygenase; GST: glutathione-S-transferase; UGT: UDP-glucosyl transferase. (e) PCA results of the potential detoxification-related genes from FAW larvae fed on different diets.



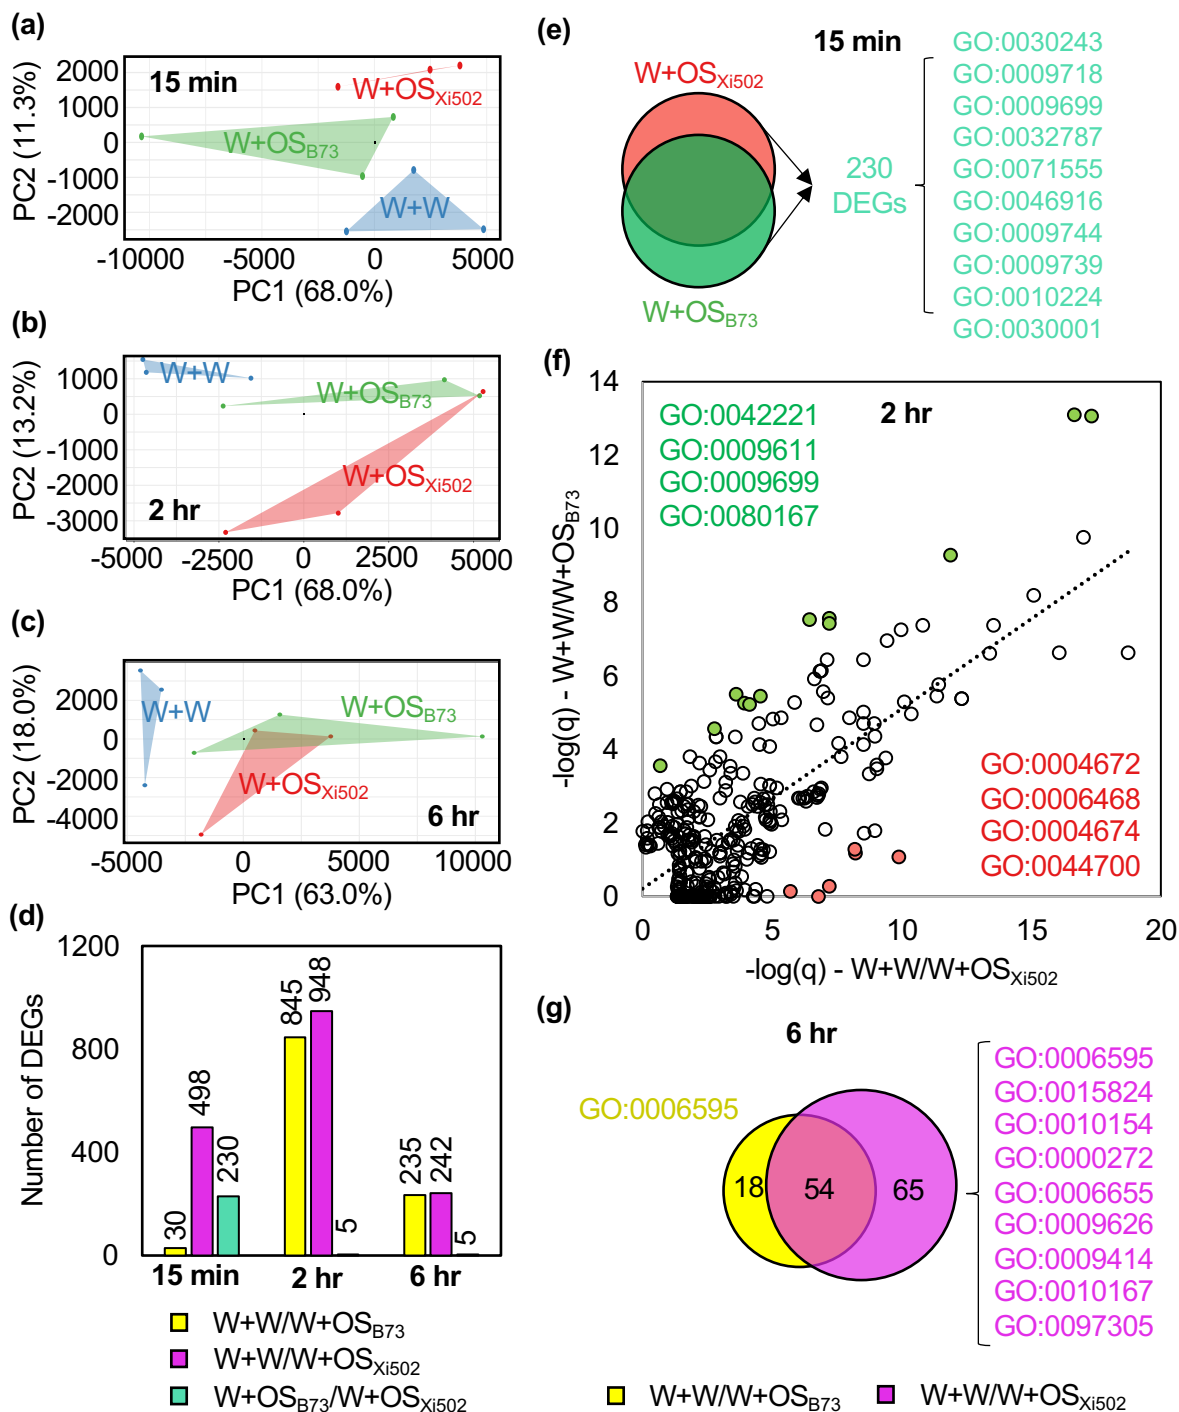

**Fig. 7. Distinct temporal dynamics in B73 leaf transcriptome elicited by oral secretion collected from FAW fed on B73 and Xi502.** (a-c) PCA result of the RNAseq data from B73 leaf tissue treated with wounding and water (W+W), wounding and oral secretion (OS) collected from B73 (W+OS<sub>B73</sub>), or wounding and OS collected from Xi502 (W+OS<sub>Xi502</sub>) collected at 15 minutes (15 min), 2 hours (2 hr), or 6 hours (6 hr) post-treatment. (d) Summary of DEGs in each of the groups above at each time point. (e) Significantly-enriched GO terms for DEGs between W+OS<sub>B73</sub> and W+OS<sub>Xi502</sub> at 15 minutes post-treatment. (f) Preferentially-enriched GO terms among W+OS<sub>B73</sub> and W+OS<sub>Xi502</sub> DEGs at 2 hours post-treatment. (g) Specifically-enriched GO terms among W+OS<sub>B73</sub> and W+OS<sub>Xi502</sub> DEGs at 6 hours post-treatment.

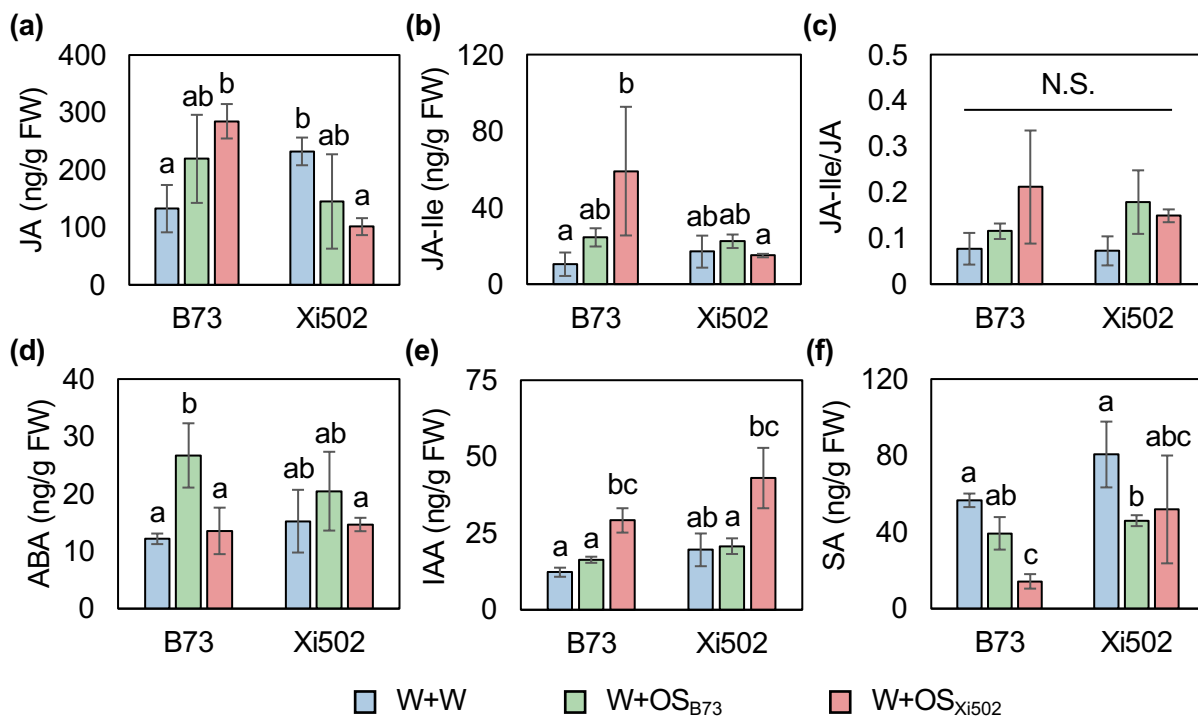

**Fig. 8. Phytohormone content in B73 and Xi502 leaves under different oral secretion treatment regimes.** Concentrations of (a) jasmonic acid (JA), (b) jasmonic acid-isoleucine conjugate (JA-Ile), (c) their calculated ratio, (d) abscisic acid (ABA), (e) indole-3-acetic acid (IAA), and (f) salicylic acid (SA) in B73 and Xi502 seedling leaves treated with wounding and water (W+W), wounding and oral secretion (OS) collected from B73 (W+OS<sub>B73</sub>), or wounding and OS collected from Xi502 (W+OS<sub>Xi502</sub>) after two hours. N = 3 for each genotype-treatment group. Groups significantly different from each other according to two-way ANOVA and TukeyHSD ( $p < 0.05$ ) are denoted by different letters on top of their representative columns. Error bars = standard deviation.

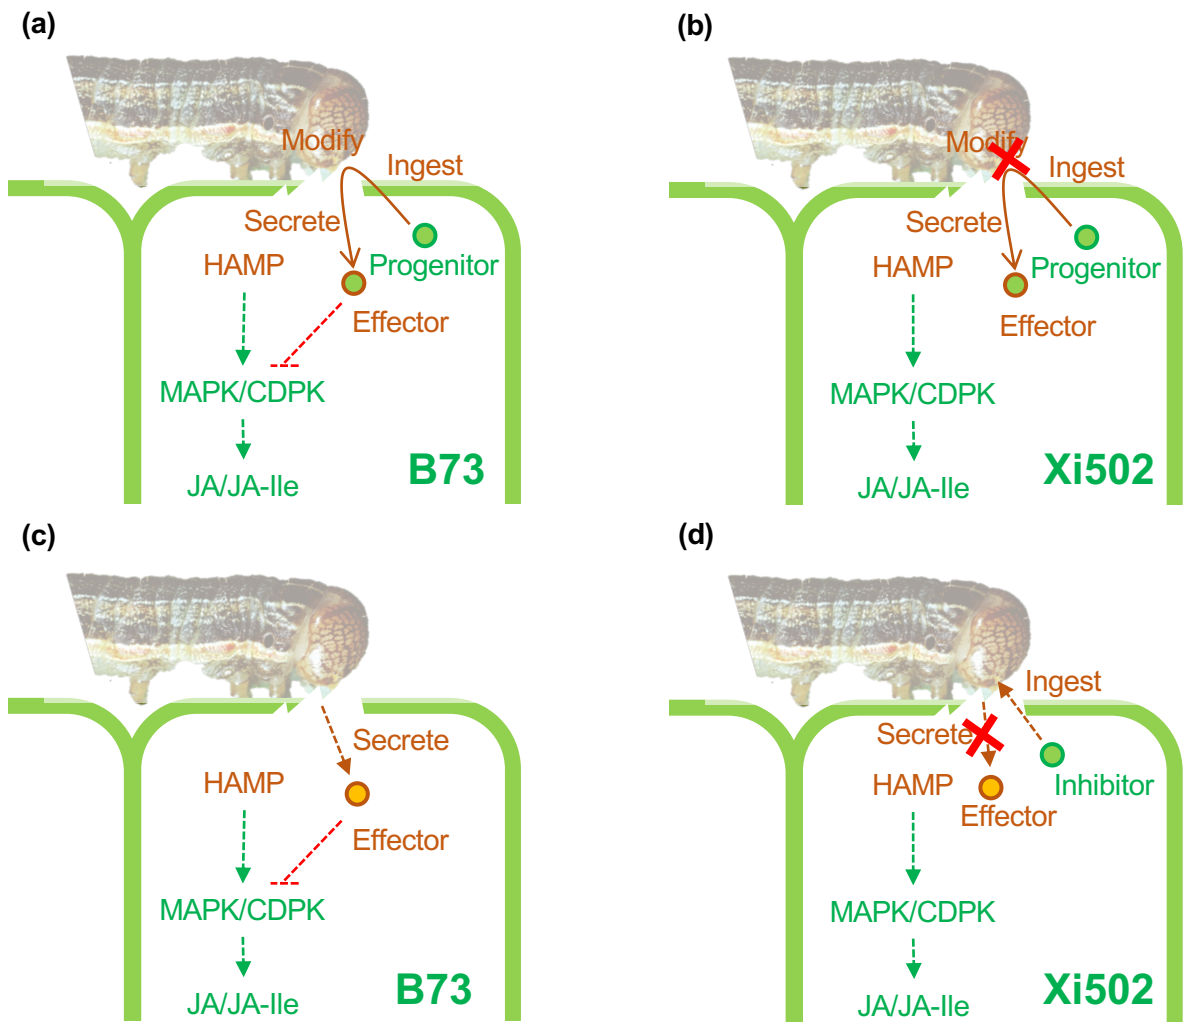

**Fig. 9. Hypothetical models of host plant genotype's influence on the elicitation activity of FAW oral secretion.** (a) In the progenitor model, a plant progenitor molecule is ingested, modified, and re-secreted into plant cells as an effector to interfere with early activated plant kinases to suppress downstream defense responses in the susceptible B73. In the resistant Xi502, the same plant molecule is resistant to the modification and hence no (or less) effector molecules will be produced, and normal plant defense responses are restored. (b) In the alternative inhibitor model, the effector molecule is directly produced and secreted by the insect, and the resistant Xi502 contains an ingestible inhibitor that hampers the effector biosynthesis and/or secretion processes. In all diagrams, plant- and insect-derived components are shown in green and orange, respectively. HAMP: herbivore-associated molecular pattern; MAPK: mitogen-activated protein kinase; CDPK: calcium-dependent protein kinase; JA: jasmonic acid; JA-Ile: jasmonic acid-isoleucine conjugate.
